# Supplementary material for: Local prevalence of extended-spectrum beta-lactamase (ESBL) producing Enterobacteriaceae intestinal carriers at admission and co-expression of ESBL and OXA-48 carbapenemase in Klebsiella pneumoniae: a prevalence survey in a Spanish University Hospital
Source: PubMed Central journal article supplement — BMJ Open. 2019 Mar 1;9(3):e024879. doi: 10.1136/bmjopen-2018-024879 (PMC6429960; doi:10.1136/bmjopen-2018-024879), 2019-03-01
Supplement: bmjopen-2018-024879.draft_revisions.pdf [file bmjopen-2018-024879.draft_revisions.pdf]

# BMJ Open

BMJ Open is committed to open peer review. As part of this commitment we make the peer review history of every article we publish publicly available.

When an article is published we post the peer reviewers' comments and the authors' responses online. We also post the versions of the paper that were used during peer review. These are the versions that the peer review comments apply to.

The versions of the paper that follow are the versions that were submitted during the peer review process. They are not the versions of record or the final published versions. They should not be cited or distributed as the published version of this manuscript.

BMJ Open is an open access journal and the full, final, typeset and author-corrected version of record of the manuscript is available on our site with no access controls, subscription charges or pay-per-view fees (<http://bmjopen.bmj.com>).

If you have any questions on BMJ Open's open peer review process please email [info.bmjopen@bmj.com](mailto:info.bmjopen@bmj.com)

# BMJ Open

## Local prevalence of extended-spectrum beta-lactamase (ESBL) producing Enterobacteriaceae intestinal carriers at admission in a Spanish University Hospital and co-expression of ESBL and OXA-48 carbapenemase in *Klebsiella pneumoniae*

|                               |                                                                                                                                                                                                                                                                                                                                                                                                                                                                                                                                                                                                                                                                                                                                                                                                                                                                                                                                                                                                                                                                                                                                                                                                                                                                                                                                                                                                                                                           |
|-------------------------------|-----------------------------------------------------------------------------------------------------------------------------------------------------------------------------------------------------------------------------------------------------------------------------------------------------------------------------------------------------------------------------------------------------------------------------------------------------------------------------------------------------------------------------------------------------------------------------------------------------------------------------------------------------------------------------------------------------------------------------------------------------------------------------------------------------------------------------------------------------------------------------------------------------------------------------------------------------------------------------------------------------------------------------------------------------------------------------------------------------------------------------------------------------------------------------------------------------------------------------------------------------------------------------------------------------------------------------------------------------------------------------------------------------------------------------------------------------------|
| Journal:                      | <i>BMJ Open</i>                                                                                                                                                                                                                                                                                                                                                                                                                                                                                                                                                                                                                                                                                                                                                                                                                                                                                                                                                                                                                                                                                                                                                                                                                                                                                                                                                                                                                                           |
| Manuscript ID                 | bmjopen-2018-024879                                                                                                                                                                                                                                                                                                                                                                                                                                                                                                                                                                                                                                                                                                                                                                                                                                                                                                                                                                                                                                                                                                                                                                                                                                                                                                                                                                                                                                       |
| Article Type:                 | Research                                                                                                                                                                                                                                                                                                                                                                                                                                                                                                                                                                                                                                                                                                                                                                                                                                                                                                                                                                                                                                                                                                                                                                                                                                                                                                                                                                                                                                                  |
| Date Submitted by the Author: | 19-Jun-2018                                                                                                                                                                                                                                                                                                                                                                                                                                                                                                                                                                                                                                                                                                                                                                                                                                                                                                                                                                                                                                                                                                                                                                                                                                                                                                                                                                                                                                               |
| Complete List of Authors:     | <p>DIAZ AGERO PEREZ, CRISTINA; Hospital Universitario Ramon y Cajal, Servicio de Medicina Preventiva y Salud Publica; INSTITUTO RAMON Y CAJAL DE INVESTIGACIÓN SANITARIRA (IRYCIS),</p> <p>LOPEZ FRESNEÑA, NIEVES; Hospital Universitario Ramon y Cajal, Servicio de Medicina Preventiva y Salud Pública; Instituto Ramón y Cajal de Investigación Sanitaria (IRYCIS)</p> <p>Rincon Carlavilla, Angela; Hospital Universitario Ramon y Cajal, Servicio de Medicina Preventiva y Salud Publica; Instituto Ramón y Cajal de Investigación Sanitaria (IRYCIS)</p> <p>Hernandez Garcia, Marta ; Hospital Universitario Ramon y Cajal, Servicio de Microbiología; Red Española de Investigación en Patología Infecciosa (REIPI)</p> <p>Ruiz-Garbajosa, Patricia; Hospital Universitario Ramon y Cajal, Servicio de Microbiología; Red Española de Investigación en Patología Infecciosa (REIPI)</p> <p>ARANAZ ANDRÉS , JESÚS MARIA; Hospital Universitario Ramon y Cajal, Servicio de Medicina Preventiva y Salud Publica; IRYCIS, INSTITUTO RAMÓN Y CAJAL DE INVESTIGACIÓN SANITARIA</p> <p>Maechler, F; Charite Universitätsmedizin Berlin, Gastmeier, Petra; Charite, Infection Control</p> <p>Bonten, Marc; University Medical Center Utrecht, Department of Medical Microbiology</p> <p>Canton, Rafael; Hospital Universitario Ramón y Cajal, Madrid, Spain, Servicio de Microbiología; Red Española de Investigación en Patología Infecciosa (REIPI)</p> |
| Keywords:                     | Extended-spectrum beta-lactamase producing Enterobacteriaceae, Carbapenemase producing Enterobacteriaceae, Surveillance, Prevalence                                                                                                                                                                                                                                                                                                                                                                                                                                                                                                                                                                                                                                                                                                                                                                                                                                                                                                                                                                                                                                                                                                                                                                                                                                                                                                                       |

SCHOLARONE™  
Manuscripts

1  
2  
3 1 **TITLE:**

4 2 **Local prevalence of extended-spectrum beta-lactamase (ESBL) producing**  
5 3 ***Enterobacteriaceae* intestinal carriers at admission in a Spanish University**  
6 4 **Hospital and co-expression of ESBL and OXA-48 carbapenemase in *Klebsiella***  
7 5 ***pneumoniae***  
8  
9  
10  
11  
12  
13  
14

15 7 **Authors:**

16 8 C. Díaz-Agero Pérez<sup>1</sup>, N. López-Fresneña<sup>1</sup>, A.L. Rincón-Carlavilla<sup>1</sup>, M. Hernández-  
17 9 García<sup>2,3</sup>, P. Ruiz-Garbajosa<sup>2,3</sup>, J.M. Aranz-Andrés<sup>1</sup>, F. Maechler<sup>4</sup>, P. Gastmeier<sup>4</sup>, M.  
18 10 Bonten<sup>5</sup>, R Cantón<sup>2,3</sup>  
19  
20  
21  
22  
23

24 12 <sup>1</sup>Servicio de Medicina Preventiva y Salud Pública, Hospital Universitario Ramón y Cajal  
25 13 and Instituto Ramón y Cajal de Investigación Sanitaria (IRYCIS), Madrid, Spain.

26 14 <sup>2</sup>Servicio de Microbiología, Hospital Universitario Ramón y Cajal and Instituto Ramón y  
27 15 Cajal de Investigación Sanitaria (IRYCIS), Madrid, Spain.

28 16 <sup>3</sup>Red Española de Investigación en Patología Infecciosa (REIPI), Madrid, Spain.

29 17 <sup>4</sup>Charité –University Medicine Berlin, Germany.

30 18 <sup>5</sup>University Medical Center Utrecht (UMC Utrecht), Utrecht, The Netherlands.  
31  
32  
33  
34  
35  
36  
37  
38  
39

40 20 **Corresponding author:**

41 21 Cristina Díaz-Agero Pérez  
42 22 Servicio de Medicina Preventiva y Salud Pública, Hospital Universitario Ramón y Cajal.  
43 23 Carretera de Colmenar Km 9,1. Madrid 28034. Spain  
44 24 email address: cristina.diazagero@salud.madrid.org)  
45 25 Tl.: 0034913368372 / 0034913368604  
46  
47  
48  
49  
50  
51  
52  
53  
54  
55  
56  
57  
58  
59  
60

1  
2  
3 29 **ABSTRACT**

4 30 **Objective:** to assess the prevalence of ESBL-producing *Enterobacteriaceae* (ESBL-E)  
5  
6 31 fecal carriers at admission in a University Hospital in Spain.

7  
8 32 **Design:** prevalence survey.

9  
10 33 **Setting:** Pneumology, Gastroenterology, Urology and Neurosurgery units at a  
11  
12 34 University tertiary hospital in Madrid (Spain).

13  
14 35 **Participants:** 10,643 patients aged 18 and older admitted from March-2014 to April-  
15  
16 36 2016 with a rectal swab taken at admission or as soon as possible within the first 48  
17  
18 37 hours.

19  
20 38 **Primary and secondary outcome measures:** prevalence of ESBL-E fecal carriers  
21  
22 39 and prevalence of ESBL-E infections at admission.

23  
24 40 **Results:** the ESBL-E carriers prevalence on admission was 7.70% (CI 95% 7.19-8.22).  
25  
26 41 Most of the isolates were *Escherichia coli* (77.51%), followed by *Klebsiella pneumoniae*  
27  
28 42 (20.71%). Eighty-eight (10.41%) of ESBL-E were simultaneous ESBL and  
29  
30 43 carbapenemase (CP) producers, 1.83% in the case of *E. coli* and 42.86% among *K.*  
31  
32 44 *pneumoniae* isolates. Of the ESBL typed, 52.15% belonged to the CTX-M-15 type and  
33  
34 45 91.38% of the carbapenemases were OXA-48 type. Only 0.43% patients presented an  
35  
36 46 active infection by ESBL-E at admission.

37  
38 47 **Conclusions:** The prevalence found in our study is very similar to that found in the  
39  
40 48 literature. However, we found a high percentage of simultaneous ESBL and CP  
41  
42 49 producers, particularly in *Klebsiella pneumoniae*. Despite the high prevalence of  
43  
44 50 colonized patients, the ESBL-infection rate on admission was very low.

45  
46 51 **Key words:** Extended-spectrum beta-lactamase producing *Enterobacteriaceae*,  
47  
48 52 carbapenemase producing *Enterobacteriaceae*, surveillance, prevalence.

49  
50 53  
51  
52 54  
53  
54 55  
55  
56 56  
57  
58  
59  
60

## ARTICLE SUMMARY

### Strengths and limitations of this study

- This study is one of the most prolonged in time and with the largest number of patients assessing colonization with multidrug resistant microorganisms, including adult participants of variable age groups and gender from a university hospital providing specialized assistance to 8.51% of the population of Madrid (Spain)
- The large number of patients included (10,643) gives strength to the results.
- Genes codifying ESBL and CP were characterized by PCR and sequencing. Unfortunately total characterization was not feasible in all isolates, only 24.73% of total ESBL producing isolates and 65.91% of total CP producing isolates.

### FUNDING STATEMENT

- The project falls within the R-GNOSIS study (Resistance of Gram-Negative Organisms: Studying Intervention Strategies), within the Work Package 5 Patient isolation strategies for ESBL carriers in medical and surgical hospital wards, funded by the European Union (FP7-HEALTH-2011-SINGLE STAGE-N°282512).
- MH-G is supported with a contract from Instituto de Salud Carlos III of Spain (iP-FIS program, ref. IFI14/00022).

### POTENTIAL CONFLICTS OF INTEREST

All authors declare that they have no conflict of interest.

1  
2  
3 82 **TEXT**

4  
5 83 **BACKGROUND**

6  
7 84 The emergence of antimicrobial resistance represents a global challenge for healthcare  
8  
9 85 due to the limited treatment options. Extended-spectrum beta-lactamases (ESBL) are  
10  
11 86 the main mechanisms of acquired resistance in Gram-negative bacteria. Until the late  
12  
13 87 90s most ESBLs were isolated in nosocomial outbreaks, their prevalence was higher in  
14  
15 88 *Klebsiella pneumoniae* than *Escherichia coli*, and there was significant variation among  
16  
17 89 countries, hospitals and wards [1, 2]. They were isolated in higher frequency in the  
18  
19 90 Intensive Care Units (ICU) and recent surgery, catheterization, urinary catheterization,  
20  
21 91 prolonged hospitalization, ICU admission and previous use of cephalosporins and  
22  
23 92 aminoglycosides were leading risk factors [3, 4].

24  
25 93 The situation today is very different since their prevalence has increased dramatically  
26  
27 94 in the community, especially in urinary tract infections, where these enzymes are more  
28  
29 95 frequently isolated in *E. coli* [5-8]. The main clinical relevance of ESBL seems to be the  
30  
31 96 inadequate empirical treatment, delaying the efficient antimicrobial treatment for  
32  
33 97 example up to six times in the case of *E. coli* and *K. pneumoniae* ESBL (i.e., 72 hours  
34  
35 98 instead of 11 hours for susceptible strains) [9, 10]. It is necessary to know the  
36  
37 99 prevalence of microbial resistance in our geographic area and the epidemiological  
38  
39 100 characteristics in order to establish the scope of the problem and analyze its evolution.  
40  
41 101 The aim of this study was to assess the prevalence of ESBL-producing  
42  
43 102 *Enterobacteriaceae* (ESBL-E) fecal carriers at admission in hospital wards during an  
44  
45 103 active surveillance screening program (R-GNOSIS project).

46  
47 104

48 105 **METHODS**

49  
50 106 **Study design and settings**

51  
52 107 The project falls within the R-GNOSIS study (Resistance of Gram-Negative Organisms:  
53  
54 108 Studying Intervention Strategies), within the Work Package 5 Patient isolation

109 strategies for ESBL carriers in medical and surgical hospital wards, funded by the EU  
110 (FP7-HEALTH-2011-SINGLE STAGE-N°282512).

111 The University Hospital Ramón y Cajal is a public referral center, located in the North  
112 of Madrid (Spain). It provides specialized assistance to 558,373 citizens, who represent  
113 8.51% of the population of Madrid. With 1,118 beds, it accounted for 31,179  
114 admissions in year 2014; 31,253 in 2015, and 31,847 in 2016. The Pneumology (41  
115 beds), Gastroenterology (40 beds), Urology (41 beds) and Neurosurgery (20 beds)  
116 wards took part in the study.

### 117 **Patients**

118 Between March 3<sup>rd</sup> 2014 and April 3<sup>rd</sup> 2016, screening rectal swabs were obtained,  
119 after verbal consent, from all patients aged 18 and older, at admission or as soon as  
120 possible within the first 48 hours.

### 121 **Patient involvement**

122 All patients were informed of the aim of the study and the consequences of a positive  
123 result (contact isolation and needing a new rectal screening at any hospital admission  
124 in the future to check their status) and gave their verbal consent to participate. As soon  
125 as the microbiological result was known by the investigators, patients and their  
126 familiars were informed.

### 127 **Laboratory analysis**

128 The samples were seeded on ChromID-ESBL and Chromo-ID CARBA/OXA-48  
129 (BioMérieux, France) selective chromogenic-agar plates. Bacterial identification was  
130 performed using the MALDI-TOF-MS (Bruker-Daltonics, Germany) mass spectrometry.  
131 ESBL and carbapenemase (CP) production were phenotypically confirmed by the  
132 double-disk diffusion test, Hodge Test and KPC/MBL/OXA-48 Confirm and ESBL  
133 AmpC Screen Kits (Rosco Diagnostica, Germany). Antimicrobial susceptibility was  
134 studied with microdilution (MicroScan, Beckman, CA) and gradient strips (Etests,  
135 BioMérieux, France). Genes codifying ESBL (*bla*<sub>SHV</sub>, *bla*<sub>TEM</sub>, *bla*<sub>CTX-M</sub>) and CP (*bla*<sub>VIM</sub>,  
136 *bla*<sub>KPC</sub>, *bla*<sub>NDM</sub>, *bla*<sub>OXA-48</sub>) were characterized by PCR and sequencing.

1  
2  
3 137 **Ethics**

4  
5 138 The study was carried out in accordance with the Declaration of Helsinki and Good  
6  
7 139 Clinical Practice Guidelines (ICH-GCP-Guidelines, CMPM/ICH/135/95) of the  
8  
9 140 European Medicines Agency. It was granted authorization by the Ethics Committee of  
10  
11 141 Clinical Research and waiver of the requirements to obtain informed consent from  
12  
13 142 patients, being verbal consent considered sufficient (Ref. 251/13).

14  
15 143 Specifications stipulated in the Personal Data Protection Act 15/1999, of 13 December  
16  
17 144 were followed.

18  
19 145 **Statistical analyses**

20  
21 146 A descriptive analysis of the variables collected was conducted, the qualitative  
22  
23 147 variables were expressed as percentages and the quantitative variables as measures  
24  
25 148 of central tendency (mean and median) and dispersion (standard deviation). Pearson's  
26  
27 149 Chi-squared test was used to compare proportions and the Student's T-test to compare  
28  
29 150 means. All statistics analysis was performed using SPSS Statistics v19 (IBM®)  
30  
31 151 software.

32  
33 152 **RESULTS**

34  
35 153 During the research period 12,590 admissions of 9,706 patients took place in the  
36  
37 154 participating wards. In 84.5% of admissions, a rectal swab could be obtained within the  
38  
39 155 first 48 hours of admission. Table 1.

40  
41 156

42  
43 157 **TABLE 1. Patients admitted to Gastroenterology, Pneumology, Urology and**  
44  
45 158 **Neurosurgery wards and patients included in the study.**

| Ward             | Admissions (n) | Swab at admission (n) | %     |
|------------------|----------------|-----------------------|-------|
| Gastroenterology | 3,380          | 2,916                 | 86.27 |
| Pneumology       | 3,240          | 2,752                 | 84.94 |
| Urology          | 4,685          | 3,963                 | 84.59 |
| Neurosurgery     | 1,285          | 1,012                 | 78.75 |



|              |               |               |              |
|--------------|---------------|---------------|--------------|
| <b>Total</b> | <b>12,590</b> | <b>10,643</b> | <b>84.55</b> |
|--------------|---------------|---------------|--------------|

159

160 Gender and mean age of included patients are shown in Table 2.

161

162 **TABLE 2. Age and gender of the included patients.**

| Ward             | Gender               |                      | Age (years)          |                |
|------------------|----------------------|----------------------|----------------------|----------------|
|                  | Men (%)              | Women (%)            | Mean (S.D.)          | Median (I.R.)  |
| Gastroenterology | 1,732 (59.39)        | 1,184 (40.61)        | 66.53 (16.59)        | 69 (26.75)     |
| Pneumology       | 1,625 (59.05)        | 1,127 (40.95)        | 70.72 (15.28)        | 74 (19)        |
| Urology          | 3,009 (75.93)        | 954 (24.07)          | 66.89 (14.56)        | 69 (20)        |
| Neurosurgery     | 533 (52.67)          | 479 (47.33)          | 60.23 (16.52)        | 61 (25)        |
| <b>Total</b>     | <b>6,899 (64.82)</b> | <b>3,744 (35.18)</b> | <b>64.91 (16.79)</b> | <b>67 (25)</b> |

163 S.D.: standard deviation; I.R.: interquartile range.

164

165 The prevalence of ESBL-E fecal carriers at admission was 7.7% (Table 3). Table 3  
166 shows the distribution of carriers by gender and ward, as well as their age (mean and  
167 median).

168 The majority of patients colonized with ESBL-E were male, just like the majority of  
169 hospital patients, the difference not being statistically significant. The mean age of  
170 colonized patients was higher than the mean age of the total number of hospitalized  
171 patients (69.29 -S.D.15.67 vs 64.91 -S.D. 16.79-), the difference being statistically  
172 significant ( $p = 0.0087$ ).

173 The difference in prevalence of colonization at admission among the surveyed wards  
174 was statistically significant ( $p = 0.001$ ). The highest prevalence was found in the  
175 Gastroenterology ward, with 9.05%, the difference being significant with the rest of  
176 wards ( $p = 0.01$ ). When comparing the prevalence between medical wards

1  
2  
3 177 (Pneumology and Gastroenterology) and surgical wards (Urology and Neurosurgery),  
4  
5 178 the difference was not statistically significant.  
6  
7 179 A total of 845 multiresistant *Enterobacteriaceae* were isolated in 820 patients, as 25  
8  
9 180 patients were colonized by more than one microorganism at the time of admission  
10  
11 181 (0.23%). Eighty-eight (10.41%) of the isolated *Enterobacteriaceae* were simultaneous  
12  
13 182 ESBL and carbapenemase (CP) producers, 33.47% of these patients were known  
14  
15 183 carriers, i.e., their clinical records included a previous positive culture for ESBL-E.  
16  
17  
18  
19  
20  
21  
22  
23  
24  
25  
26  
27  
28  
29  
30  
31  
32  
33  
34  
35  
36  
37  
38  
39  
40  
41  
42  
43  
44  
45  
46  
47  
48  
49  
50  
51  
52  
53  
54  
55  
56  
57  
58  
59  
60

184

**TABLE 3. ESBL-producing *Enterobacteriaceae* carriers at admission.**

| Hospital admission<br>wards | Gender             |                    | Age (years)          |                   | Prevalence (%) CI 95%   |
|-----------------------------|--------------------|--------------------|----------------------|-------------------|-------------------------|
|                             | Men (%)            | Women (%)          | Mean (S.D.)          | Median (I.R.)     |                         |
| Gastroenterology            | 160 (60.61)        | 104 (39.39)        | 66.33 (16.56)        | 67.5 (26.75)      | 9.05 (7.99-10.11)       |
| Pneumology                  | 122 (61.31)        | 77 (38.69)         | 74.78 (14.36)        | 79 (15)           | 7.23 (6.25-8.22)        |
| Urology                     | 234 (80.69)        | 56 (19.31)         | 69.82 (14.04)        | 72 (21)           | 7.32 (6.49-8.14)        |
| Neurosurgery                | 44 (65.67)         | 23 (34.33)         | 62.27 (17.14)        | 66 (26)           | 6.62 (5.04-8.20)        |
| <b>Total</b>                | <b>560 (68.29)</b> | <b>260 (31.71)</b> | <b>69.29 (15.67)</b> | <b>72 (24.75)</b> | <b>7.70 (7.19-8.22)</b> |

185

186 ESBL: extended-spectrum beta-lactamases; S.D.: standard deviation; I.R.: interquartile range ; CI: confidence interval.

187

188

1  
2  
3 189 The most frequently isolated ESBL-producer microorganism at admission was *E. coli*  
4  
5 190 (77.51%; -n=655), followed by *K. pneumoniae* (20.71%, n=175), being only 1.78%  
6  
7 191 other species (*E. cloacae* 0.59%; *C. freundii* 0.36%; *E. aerogenes* 0.24%; *C.*  
8  
9 192 *amalonaticus* 0.12%; *C. koseri* 0.12%; *E. asburiae* 0.12%; *K. oxytoca* 0.12%;  
10  
11 193 *Acinetobacter* spp 0.12%). Among ESBL-*E. coli* isolates, 1.83% were simultaneous  
12  
13 194 ESBL and CP producers (n=12). Among ESBL-*K. pneumoniae* isolates, 42.86% were  
14  
15 195 simultaneous ESBL and CP producers (n=75). Only one patient was colonized by a  
16  
17 196 different ESBL and CP producer, *K. oxytoca*.

18  
19 197 The typing of 209 beta-lactamases (24.73% of total ESBL) and 58 carbapenemases  
20  
21 198 was possible (65.91% of total CP). Most of ESBL (83.25%) belonged to the CTX-M  
22  
23 199 group, CTX-M-15 being the most numerous, followed by CTX-M-14. The remaining  
24  
25 200 16.75% belonged to the SHV group, SHV-12 being the most frequent (Table 4). For the  
26  
27 201 typed CP, 91.38% were OXA-48 type (Table 5). In the case of 4 patients colonized  
28  
29 202 simultaneously by 2 different ESBL-E (in 2 patients ESBL-*E. coli* and ESBL-*K.*  
30  
31 203 *pneumoniae* and in the other ESBL+CP-*E. coli* and ESBL+CP-*K. pneumoniae*  
32  
33 204 respectively), both microorganisms carried the same enzyme type, CTX-M-15 in 3 of  
34  
35 205 them and CTX-M-14 in 1, and OXA-48 in the case of CP.

36  
37 206

38  
39 207

40  
41 208

42  
43 209

44  
45 210

46  
47 211

48  
49 212

50  
51 213

52  
53 214

54  
55 215

216 **TABLE 4. Distribution of ESBL strains isolated and typed in rectal swabs at**  
 217 **hospital admission**

| Enzyme       | Microorganism          |                          |                           |                            |                            |                              | Total (%)           |
|--------------|------------------------|--------------------------|---------------------------|----------------------------|----------------------------|------------------------------|---------------------|
|              | ESBL<br><i>E. coli</i> | ESBL<br><i>K. pneum.</i> | ESBL<br><i>E. cloacae</i> | ESBL<br><i>C. freundii</i> | ESBL +CP<br><i>E. coli</i> | ESBL +CP<br><i>K. pneum.</i> |                     |
| CTX-M        | 2                      | 1                        | -                         | -                          | -                          | -                            | <b>3 (1.44%)</b>    |
| CTX-M-1      | 9                      | 4                        | -                         | -                          | -                          | -                            | <b>13 (6.22%)</b>   |
| CTX-M-9      | 10                     | 3                        | -                         | -                          | -                          | -                            | <b>13 (6.22%)</b>   |
| CTX-M-14     | 24                     | 1                        | -                         | -                          | 2                          | -                            | <b>27 (12.92%)</b>  |
| CTX-M-15     | 34                     | 31                       | 1                         | -                          | 3                          | 40                           | <b>109 (52.15%)</b> |
| CTX-M-27     | 6                      | -                        | -                         | -                          | -                          | -                            | <b>6 (2.87%)</b>    |
| CTX-M-32     | 2                      | -                        | -                         | -                          | -                          | -                            | <b>2 (0.96%)</b>    |
| CTX-M-55     | 1                      | -                        | -                         | -                          | -                          | -                            | <b>1 (0.48%)</b>    |
| SHV          | 5                      | 1                        | -                         | -                          | -                          | -                            | <b>6 (2.87%)</b>    |
| SHV-2        | -                      | 1                        | -                         | -                          | -                          | -                            | <b>1 (0.48%)</b>    |
| SHV-12       | 7                      | 8                        | -                         | 1                          | -                          | 5                            | <b>21 (10.05%)</b>  |
| SHV-28       | -                      | 5                        | -                         | -                          | -                          | 1                            | <b>6 (2.87%)</b>    |
| SHV-31       | -                      | 1                        | -                         | -                          | -                          | -                            | <b>1 (0.48%)</b>    |
| <b>Total</b> | <b>100</b>             | <b>56</b>                | <b>1</b>                  | <b>1</b>                   | <b>5</b>                   | <b>46</b>                    | <b>209 (100%)</b>   |

218

219 ESBL: Extended-spectrum beta-lactamases; CP: carbapenemase.

220

221

222

223

224

225

226

227

228 **TABLE 5. Distribution of carbapenemase strains isolated and typed in rectal**  
 229 **swabs at hospital admission**

| Enzyme | Microorganism              |                                  |             |
|--------|----------------------------|----------------------------------|-------------|
|        | ESBL +CP<br><i>E. coli</i> | ESBL +CP<br><i>K. pneumoniae</i> | Total (%)   |
| KPC-3  | 1                          | -                                | 1 (1.72%)   |
| NDM-1  | -                          | 1                                | 1 (1.72%)   |
| OXA-48 | 8                          | 45                               | 53 (91.38%) |
| VIM-1  | -                          | 3                                | 3 (5.17%)   |
| Total  | 9                          | 49                               | 58 (100%)   |

230

231 ESBL: Extended-spectrum beta-lactamases; CP: carbapenemase

232

233 Fifty-four patients presented an active infection by ESBL-E at admission, i.e., 0.43% of  
 234 patients admitted during the research period and 6.59% of ESBL-E intestinal carriers.

235 Of those 54 patients, all except one also showed a positive rectal swab, 90.74% of  
 236 those (49 patients) with the same specie causing the infection, and 9.26% (5 patients)  
 237 with a different ESBL-E. Out of the diagnosed infections, 69.09% (38 urine cultures)  
 238 were urinary tract infections, 14.55% bacteraemia (n=8; 1 of them secondary to a  
 239 urinary tract infection), two community acquired pneumonias (3.64%), 2 surgical site  
 240 infections (3.64%), 2 abscesses (3.64%), 1 lower respiratory infection (1.82%), 1  
 241 gastrostomy insertion site infection (1.82%), and 1 Fournier's gangrene (1.82%).

242 A total of 56 microorganisms were isolated in the 55 positive clinical cultures, as one of  
 243 them was positive for two ESBL-E. The most frequently isolated microorganism was  
 244 once again *E. coli* (67.86%), followed by ESBL and CP-*K. pneumoniae* (23.21%),  
 245 ESBL-*K. pneumoniae* (7.14%); *K. oxytoca* was isolated in 1 culture (1.79%).

246

1  
2  
3 247 **DISCUSSION**

4 248 In our study, the prevalence of ESBL-E carriers at admission was 7.7%, ranging  
5  
6 249 between 6.62% and 9.05% depending on the ward. The prevalence of ESBL-E carriers  
7  
8 250 in healthy individuals as well as in ambulatory and hospitalized patients has been  
9  
10 251 researched in a number of studies. In all of them, *E. coli* is always the most frequently  
11  
12 252 isolated microorganism, similarly to our study (77.51%) [11-19]. In a meta-analysis  
13  
14 253 published in 2016 which analyzed prevalence studies in healthy persons, and included  
15  
16 254 28,909 individuals from 66 studies, the mean global prevalence of colonization was  
17  
18 255 14%, with great variability among regions [19]. It was higher in Asia, with 46% and  
19  
20 256 Africa with 22%; in Europe the mean prevalence was 4%, with 3% in Central Europe,  
21  
22 257 4% in Northern Europe and 6% in Southern Europe. Finally, in America, the mean  
23  
24 258 prevalence was 2%, although it was admitted that there were very few studies for this  
25  
26 259 region [20].

27  
28 260 Our prevalence of intestinal carriers at admission is virtually the same to that found by  
29  
30 261 a Dutch study recently published, which was 7.9% in patients coming from their homes  
31  
32 262 and 8.6% in patients coming from long-term care facilities, a distinction not made in our  
33  
34 263 research [21]. Studies in three different areas in Spain (Madrid, Barcelona and  
35  
36 264 Zaragoza) show that the prevalence of carriers has increased in the last years,  
37  
38 265 reaching rates ranging from 5.5% and 8.1% in 2002 and 2004, similarly to our study  
39  
40 266 findings [11, 13, 16]. In another study performed in Seville, the prevalence of carriers  
41  
42 267 among patients admitted to Emergency Units was 7.4%, also very similar to our figure  
43  
44 268 [22].

45  
46 269 In our facility, 10.41% of ESBL microorganisms were simultaneous carbapenemase  
47  
48 270 producers, being 85.22% *K. pneumoniae*, 13.64% *E. coli* and 1.14 *K. oxytoca*. Of the  
49  
50 271 58 carbapenemases typed (65.91% of total CP), the vast majority of them, 91.38%  
51  
52 272 belonged to the OXA-48 type. This fact is especially important in the case of *K.*  
53  
54 273 *pneumoniae* with 42.86% of them being ESBL and CP producers (91.84% OXA-48).  
55  
56 274 ESBL and CP *K. pneumoniae* was responsible for 23.21% of the infections diagnosed

1  
2  
3 275 at hospital admission (69.27% of them urinary tract infections). We did not find a similar  
4  
5 276 study to compare our data with but we think this finding must be deeply analyzed.

6  
7 277 Male gender has been identified as a risk factor for the intestinal colonization by ESBL-  
8  
9 278 E [7, 20, 21, 23, 24]. In our study, as in Valverde et al., the majority of colonized  
10  
11 279 patients were men, but they were also the majority of the total number of hospitalized  
12  
13 280 patients, the difference not being statistically significant [11]. Age is another risk factor  
14  
15 281 identified in the bibliography; in our study, the mean age of colonized patients was  
16  
17 282 higher than the mean age of hospitalized patients (69.29 years vs 64.91 years), being  
18  
19 283 the difference statistically significant in this case ( $p = 0.0087$ ) [23, 24].

20  
21 284 The prevalence of carriers at admission was higher in the Gastroenterology ward,  
22  
23 285 despite being younger than the mean, with a difference statistically significant as  
24  
25 286 compared to the rest of included wards. In other published studies, liver disease has  
26  
27 287 been identified as a risk factor for intestinal colonization by ESBL-E, being the  
28  
29 288 prophylactic use of fluoroquinolones to prevent spontaneous bacterial peritonitis in  
30  
31 289 patients with chronic liver disease one of the possible explanations [25, 26]. Another  
32  
33 290 risk factor for ESBL-E carriage recently described in the literature is proton pump  
34  
35 291 inhibitors (PPI) use, and these type of patients are often receiving PPIs and other  
36  
37 292 medication for gastroesophageal reflux disease [27, 28]. In our case, we cannot provide  
38  
39 293 an explanation as risk factors for every patient were not recorded.

40  
41 294 Beta-lactamase characterization was not feasible in all isolates, only 24.73% of total  
42  
43 295 ESBL producing isolates. The main enzyme group was CTX-M, the most common  
44  
45 296 according to the literature, followed by SHV, CTX-M-15 group prevailing with more than  
46  
47 297 52% [8, 12-14, 19, 21, 22, 24].

48  
49 298 In the last years, ESBL-E infections have become an increasing concern; in the United  
50  
51 299 States for example 140,000 hospital-acquired ESBL-E infections are estimated to occur  
52  
53 300 per year [29]. Infections by these bacteria are associated to higher mortality rates and  
54  
55 301 higher hospital costs compared to antibiotic-sensitive microorganisms [30]. However,  
56  
57 302 few studies have associated the fact of being an intestinal carrier of ESBL-E with the



1  
2  
3 303 development of infections caused by these bacteria. A recent cohort study performed in  
4  
5 304 patients with haematological malignancies found a 3.5-fold greater risk of developing  
6  
7 305 bacteraemia by ESBL-E among colonized patients when compared to non-colonized  
8  
9 306 patients; despite of the fact that mortality was similar in both groups, colonization was  
10  
11 307 associated to longer hospital stays, shorter survival period and higher costs [31]. On  
12  
13 308 the contrary, another similar study did not find correlation between ESBL-E colonization  
14  
15 309 and infection in neutropenic patients [32]. In our study 55 ESBL-E infections were  
16  
17 310 diagnosed at admission and almost 70% were urinary tract infections. That means that  
18  
19 311 0.43% of patients were admitted with an ESBL-E infection, which represents 6.59% of  
20  
21 312 the colonized patients. Only in one patient with ESBL-E infection at admission no  
22  
23 313 ESBL-E was isolated in the rectal swabs. Even though the vast majority of infections  
24  
25 314 were found in colonized patients, the total prevalence of infection is very low, and only  
26  
27 315 in 8 cases it consisted of bacteraemia (1 of those secondary to a urinary tract  
28  
29 316 infection). In two cases patients died during hospital admission, although their infection  
30  
31 317 had been fully resolved and death was caused by an underlying oncological disease.  
32  
33 318 This study, one of the most prolonged in time and with the largest number of patients,  
34  
35 319 confirms once again the extension of ESBL-E intestinal colonization in the community  
36  
37 320 showing, however, a low prevalence of infection. It is necessary to continue with the  
38  
39 321 epidemiological surveillance of these microorganisms, in order to acquire a better  
40  
41 322 knowledge of the implications of being an intestinal carrier of ESBL-E. The high  
42  
43 323 percentage of ESBL and CP *K. pneumoniae* producers must also be more deeply  
44  
45 324 studied.

325

**326 WORD COUNT**

327 2,256

328

**329 AUTHOR CONTRIBUTIONS**330 **Conception and design of study:** M Bonten, R Cantón, P Gastemeier, F Maechler.

1  
2  
3 331  
4 332 **Data collection:** C Díaz-Agero Pérez, N López-Fresneña, AL Rincón-Carlavilla, M  
5 333 Hernández-García, P Ruiz-Garbajosa.

6  
7 334 **Analysis and/or interpretation of data:** C Díaz-Agero Pérez, N López-Fresneña, AL  
8 335 Rincón-Carlavilla, M Hernández-García, P Ruiz-Garbajosa, JM Aranaz-Andrés, R  
9 336 Cantón.

10  
11 337  
12  
13 338 **Drafting the manuscript:** C Díaz-Agero Pérez, N López-Fresneña, AL Rincón-  
14 339 Carlavilla, M Hernández-García.

15 340  
16  
17 341 **Revising the manuscript critically for important intellectual content:** R Cantón, P  
18 342 Ruiz-Garbajosa, JM Aranaz-Andrés, M Bonten, P Gastmeier, F Maechler.

19 343  
20  
21 344 **Approval of the version of the manuscript to be published:** C Díaz-Agero Pérez, N  
22 345 López-Fresneña, AL Rincón-Carlavilla, M. Hernández-García, P. Ruiz-Garbajosa, JM  
23 346 Aranaz-Andrés, F Maechler, P Gastmeier, M Bonten, R Cantón.

24  
25 347  
26  
27  
28 348 **DATA SHARING STATEMENT**

29  
30 349 Extra data is available by emailing: [cristina.diazagero@salud.madrid.org](mailto:cristina.diazagero@salud.madrid.org)  
31 350  
32 351

33  
34 352 **ACKNOWLEDGEMENTS**

35  
36 353 **Previous presentation:** preliminary results from this study were presented at ECCMID  
37 354 2016 on April 11, 2016, Amsterdam, the Netherlands.

38  
39  
40 355  
41 356

42  
43 357 **REFERENCES**

44  
45  
46 358 1. Winokur PL et al. Variations in the prevalence of strains expressing an extended-  
47 359 spectrum beta-lactamase phenotype and characterization of isolates from Europe, the  
48 360 Americas, and the Western Pacific region. *Clinical Infectious Diseases*. 2001; 32:94-  
49 361 103.

- 1  
2  
3 362 2. Babini GS, Livermore DM. Antimicrobial resistance amongst *Klebsiella* spp. collected  
4  
5 363 from intensive care units in Southern and Western Europe in 1997-1998. Journal of  
6  
7 364 Antimicrobial Chemotherapy. 2000; 45:183-189.
- 8  
9 365 3. Paterson DL, Bonomo RA. Extended-spectrum beta-lactamases: a clinical update.  
10  
11 366 Clinical Microbiology Reviews. 2005; 18: 657-686.
- 12  
13 367 4. Sirot D. Extended-spectrum plasmid-mediated beta-lactamases. Journal of  
14  
15 368 Antimicrobial Chemotherapy. 1995; 36:19-34.
- 16  
17 369 5. Pitout JD et al. Population-based laboratory surveillance for *Escherichia coli*-  
18  
19 370 producing extended-spectrum betalactamases: importance of community isolates with  
20  
21 371 blaCTX-M genes. Clinical Infectious Diseases. 2004; 38:1736-1741.
- 22  
23 372 6. Rodríguez-Baño J et al. Bacteremia due to extended-spectrum beta -lactamase-  
24  
25 373 producing *Escherichia coli* in the CTX-M era: a new clinical challenge. Clinical  
26  
27 374 Infectious Diseases. 2006; 43:1407-1414.
- 28  
29 375 7. Ben-Ami R et al. Influx of extended-spectrum beta-lactamase-producing  
30  
31 376 Enterobacteriaceae into the hospital. Clinical Infectious Diseases. 2006; 42: 925-934.
- 32  
33 377 8. Woerther PL et al. Trends in human fecal carriage of extended-spectrum beta-  
34  
35 378 lactamases in the community: Toward the globalization of CTX-M. Clinical Microbiology  
36  
37 379 Reviews. 2013; 26: 744–758.
- 38  
39 380 9. García E et al. Bacteriemias por *Escherichia coli* productor de betalactamasas de  
40  
41 381 espectro extendido (BLEE): Significación clínica y perspectivas actuales. España.  
42  
43 382 Revista Española de Quimioterapia. 2011; 24: 57-66.
- 44  
45 383 10. Lautenbach E et al. Extended-spectrum beta-lactamase-producing *Escherichia coli*  
46  
47 384 and *Klebsiella pneumoniae*: risk factors for infection and impact of resistance on  
48  
49 385 outcomes. Clinical Infectious Diseases. 2001; 32: 1162-1171.
- 50  
51 386 11. Valverde A et al. Dramatic increase in prevalence of fecal carriage of extended-  
52  
53 387 spectrum b-lactamase-producing *Enterobacteriaceae* during nonoutbreak situations in  
54  
55 388 Spain. Journal of Clinical Microbiology. 2004; 42: 4769–4775.

- 1  
2  
3 389 12. Munday CJ et al. Predominance and genetic diversity of community- and hospital-  
4  
5 390 acquired CTX-M extended-spectrum b-lactamases in York, UK. Journal of Antimicrobial  
6  
7 391 Chemotherapy. 2004; 54: 628–633.
- 8  
9 392 13. Miró E et al. Surveillance of extended spectrum b-lactamases from clinical samples  
10  
11 393 and faecal carriers in Barcelona, Spain. Journal of Antimicrobial Chemotherapy. 2005;  
12  
13 394 56: 1152–1155.
- 14  
15 395 14. Moubareck C et al. Countrywide spread of community- and hospital-acquired  
16  
17 396 extended-spectrum b-lactamase (CTX-M-15)-producing *Enterobacteriaceae* in  
18  
19 397 Lebanon. Journal of Clinical Microbiology. 2005; 43: 3309–3313.
- 20  
21 398 15. Rodrigues C et al. Extended-spectrum b-lactamase-producing flora in healthy  
22  
23 399 persons. Emerging Infectious Diseases. 2005; 11: 981–982.
- 24  
25 400 16. Castillo García FJ et al. Prevalence of fecal carriage of ESBL-producing  
26  
27 401 *Enterobacteriaceae* in hospitalized and ambulatory patients during two non-outbreak  
28  
29 402 periods. European Journal of Clinical Microbiology & Infectious Diseases. 2007; 26:  
30  
31 403 77–78.
- 32  
33 404 17. Kader AA, Kumar A, Kamath KA. Fecal carriage of extended spectrum b-  
34  
35 405 lactamase-producing *Escherichia coli* and *Klebsiella pneumoniae* in patients and  
36  
37 406 asymptomatic healthy individuals. Infection Control & Hospital Epidemiology. 2007; 28:  
38  
39 407 1114–1146.
- 40  
41 408 18. Pallecchi L et al. Rapid dissemination and diversity of CTX-M extended-spectrum  
42  
43 409 b-lactamase genes in comensal *Escherichia coli* isolates from healthy children from  
44  
45 410 low-resource settings in Latin America. Antimicrobial Agents and Chemotherapy.  
46  
47 411 2007; 51: 2720–2725.
- 48  
49 412 19. Karanika S et al. Fecal colonization with extended-spectrum beta-lactamase-  
50  
51 413 producing *Enterobacteriaceae* and risk factors among healthy individuals: a systematic  
52  
53 414 review and metaanalysis. Clinical Infectious Diseases. 2016; 63:310-318.
- 54  
55  
56  
57  
58  
59  
60

- 1  
2  
3 415 20. Shitrit P et al. Extended-spectrum beta-lactamase-producing *Enterobacteriaceae*  
4 416 carriage upon hospital admission: prevalence and risk factors. *Journal of Hospital*  
5 417 *Infection*. 2013; 85: 230-232.  
6  
7  
8 418 21. Platteel TN et al. Predicting carriage with extended-spectrum beta-lactamase-  
9 419 producing bacteria at hospital admission: a cross-sectional study. *Clinical Microbiology*  
10 420 *and Infection*. 2015; 21: 141–146.  
11  
12  
13 421 22. Rodríguez-Baño J et al. Faecal carriage of extended-spectrum beta-lactamase-  
14 422 producing *Escherichia coli*: prevalence, risk factors and molecular epidemiology.  
15 423 *Journal of Antimicrobial Chemotherapy*. 2008; 62: 1142-1149.  
16  
17  
18 424 23. Ruppé E et al. Clinical predictive values of extended-spectrum beta-lactamase  
19 425 carriage in patients admitted to medical wards. *European Journal of Clinical*  
20 426 *Microbiology & Infectious Diseases*. 2012; 31: 319–325.  
21  
22  
23 427 24. Ben-Ami R et al. A multinational survey of risk factors for infection with extended-  
24 428 spectrum beta-lactamase-producing enterobacteriaceae in nonhospitalized  
25 429 patients. *Clinical Infectious Diseases*. 2009; 49: 682–690.  
26  
27  
28 430 25. Pasricha J. Carriage of extended-spectrum beta-lactamase-producing  
29 431 *Enterobacteriaceae* among internal medicine patients in Switzerland. *Antimicrobial*  
30 432 *Resistance & Infection Control*. 2013; 2: 20.  
31  
32  
33 433 26. Han JH et al. Risk factors for gastrointestinal tract colonization with extended-  
34 434 spectrum beta-lactamase (ESBL)-producing *Escherichia coli* and *Klebsiella* species in  
35 435 hospitalized patients. *Infection Control & Hospital Epidemiology*. 2012; 33:1242–1245.  
36  
37  
38 436 27. Hamprecht A et al. Colonization with third-generation cephalosporin-resistant  
39 437 *Enterobacteriaceae* on hospital admission: prevalence and risk factors. *Journal of*  
40 438 *Antimicrobial Chemotherapy*. 2016; 71: 2957-2963.  
41  
42  
43 439 28. Huizinga P et al. Proton Pump Inhibitor use is associated with extended-spectrum  
44 440  $\beta$ -lactamase-producing *Enterobacteriaceae* rectal carriage at hospital admission: a  
45 441 cross-sectional study. *Clinical Infectious Diseases*. 2017; 64: 361-363.  
46  
47  
48  
49  
50  
51  
52  
53  
54  
55  
56  
57  
58  
59  
60

- 1  
2  
3 442 29. Centers for Disease Control and Prevention (2013). Antibiotic Resistance Threats  
4 443 in the United States. U.S. Department of Health and Human Services; Centers for  
5 444 Disease Control and Prevention. [http://www.cdc.gov/drugresistance/pdf/ar-threats-](http://www.cdc.gov/drugresistance/pdf/ar-threats-2013-508.pdf)  
6  
7 [2013-508.pdf](http://www.cdc.gov/drugresistance/pdf/ar-threats-2013-508.pdf). Accessed 12 December 2017.  
8  
9 445  
10 446 30. Stewardson AJ et al. The health and economic burden of bloodstream infections  
11 447 caused by antimicrobial susceptible and non-susceptible *Enterobacteriaceae* and  
12 448 *Staphylococcus aureus* in European hospitals, 2010 and 2011: a multicentre  
13  
14 449 retrospective cohort study. *Eurosurveillance* 21. doi: 10.2807/1560-  
15  
16 450 7917.ES.2016.21.33.30319.  
17  
18 451 31. Cornejo-Juárez P et al. Fecal ESBL *Escherichia coli* carriage as a risk factor for  
19 452 bacteremia in patients with hematological malignancies. *Supportive Care in Cancer*.  
20 453 2016; 24:253–259.  
21  
22 454 32. Arnan M et al. Risk factors for, and clinical relevance of, faecal extended spectrum  
23 455 beta-lactamase producing *Escherichia coli* (ESBL-EC) carriage in neutropenic patients  
24 456 with haematological malignancies. *European Journal of Clinical Microbiology&*  
25 457 *Infectious Diseases*. 2011; 30:355–360.  
26  
27  
28  
29  
30  
31  
32  
33  
34  
35  
36  
37  
38  
39  
40  
41  
42  
43  
44  
45  
46  
47  
48  
49  
50  
51  
52  
53  
54  
55  
56  
57  
58  
59  
60

# Reporting checklist for cross sectional study.

Based on the STROBE cross sectional guidelines.

## Instructions to authors

Complete this checklist by entering the page numbers from your manuscript where readers will find each of the items listed below.

Your article may not currently address all the items on the checklist. Please modify your text to include the missing information. If you are certain that an item does not apply, please write "n/a" and provide a short explanation.

Upload your completed checklist as an extra file when you submit to a journal.

In your methods section, say that you used the STROBE cross sectional reporting guidelines, and cite them as:

von Elm E, Altman DG, Egger M, Pocock SJ, Gotsche PC, Vandenbroucke JP. The Strengthening the Reporting of Observational Studies in Epidemiology (STROBE) Statement: guidelines for reporting observational studies.

|                        |     | Reporting Item                                                                                                                  | Page Number |
|------------------------|-----|---------------------------------------------------------------------------------------------------------------------------------|-------------|
| Title                  | #1a | Indicate the study's design with a commonly used term in the title or the abstract                                              | 2           |
| Abstract               | #1b | Provide in the abstract an informative and balanced summary of what was done and what was found                                 | 2           |
| Background / rationale | #2  | Explain the scientific background and rationale for the investigation being reported                                            | 4           |
| Objectives             | #3  | State specific objectives, including any prespecified hypotheses                                                                | 5           |
| Study design           | #4  | Present key elements of study design early in the paper                                                                         | 5           |
| Setting                | #5  | Describe the setting, locations, and relevant dates, including periods of recruitment, exposure, follow-up, and data collection | 5           |
| Eligibility criteria   | #6a | Give the eligibility criteria, and the sources and methods of selection of participants.                                        | 5           |

|    |                  |      |                                                                   |    |
|----|------------------|------|-------------------------------------------------------------------|----|
| 1  |                  | #7   | Clearly define all outcomes, exposures, predictors, potential     | 6  |
| 2  |                  |      | confounders, and effect modifiers. Give diagnostic criteria, if   |    |
| 3  |                  |      | applicable                                                        |    |
| 4  |                  |      |                                                                   |    |
| 5  |                  |      |                                                                   |    |
| 6  | Data sources /   | #8   | For each variable of interest give sources of data and details of | 6  |
| 7  | measurement      |      | methods of assessment (measurement). Describe                     |    |
| 8  |                  |      | comparability of assessment methods if there is more than one     |    |
| 9  |                  |      | group. Give information separately for for exposed and            |    |
| 10 |                  |      | unexposed groups if applicable.                                   |    |
| 11 |                  |      |                                                                   |    |
| 12 |                  |      |                                                                   |    |
| 13 |                  |      |                                                                   |    |
| 14 | Bias             | #9   | Describe any efforts to address potential sources of bias         | 6  |
| 15 |                  |      |                                                                   |    |
| 16 |                  |      |                                                                   |    |
| 17 | Study size       | #10  | Explain how the study size was arrived at                         | 7  |
| 18 |                  |      |                                                                   |    |
| 19 | Quantitative     | #11  | Explain how quantitative variables were handled in the            | 6  |
| 20 | variables        |      | analyses. If applicable, describe which groupings were chosen,    |    |
| 21 |                  |      | and why                                                           |    |
| 22 |                  |      |                                                                   |    |
| 23 |                  |      |                                                                   |    |
| 24 | Statistical      | #12a | Describe all statistical methods, including those used to control | 6  |
| 25 | methods          |      | for confounding                                                   |    |
| 26 |                  |      |                                                                   |    |
| 27 |                  |      |                                                                   |    |
| 28 |                  | #12b | Describe any methods used to examine subgroups and                | 6  |
| 29 |                  |      | interactions                                                      |    |
| 30 |                  |      |                                                                   |    |
| 31 |                  |      |                                                                   |    |
| 32 |                  | #12c | Explain how missing data were addressed                           | NA |
| 33 |                  |      |                                                                   |    |
| 34 |                  | #12d | If applicable, describe analytical methods taking account of      | NA |
| 35 |                  |      | sampling strategy                                                 |    |
| 36 |                  |      |                                                                   |    |
| 37 |                  |      |                                                                   |    |
| 38 |                  | #12e | Describe any sensitivity analyses                                 | NA |
| 39 |                  |      |                                                                   |    |
| 40 |                  |      |                                                                   |    |
| 41 | Participants     | #13a | Report numbers of individuals at each stage of study—eg           | 7  |
| 42 |                  |      | numbers potentially eligible, examined for eligibility, confirmed |    |
| 43 |                  |      | eligible, included in the study, completing follow-up, and        |    |
| 44 |                  |      | analysed. Give information separately for for exposed and         |    |
| 45 |                  |      | unexposed groups if applicable.                                   |    |
| 46 |                  |      |                                                                   |    |
| 47 |                  |      |                                                                   |    |
| 48 |                  |      |                                                                   |    |
| 49 |                  | #13b | Give reasons for non-participation at each stage                  | 7  |
| 50 |                  |      |                                                                   |    |
| 51 |                  | #13c | Consider use of a flow diagram                                    | NA |
| 52 |                  |      |                                                                   |    |
| 53 |                  |      |                                                                   |    |
| 54 | Descriptive data | #14a | Give characteristics of study participants (eg demographic,       | 7  |
| 55 |                  |      | clinical, social) and information on exposures and potential      |    |
| 56 |                  |      | confounders. Give information separately for exposed and          |    |
| 57 |                  |      | unexposed groups if applicable.                                   |    |
| 58 |                  |      |                                                                   |    |
| 59 |                  |      |                                                                   |    |
| 60 |                  |      |                                                                   |    |



|    |                  |      |                                                                      |       |
|----|------------------|------|----------------------------------------------------------------------|-------|
| 1  |                  | #14b | Indicate number of participants with missing data for each           | 7     |
| 2  |                  |      | variable of interest                                                 |       |
| 3  |                  |      |                                                                      |       |
| 4  |                  |      |                                                                      |       |
| 5  | Outcome data     | #15  | Report numbers of outcome events or summary measures.                | 7     |
| 6  |                  |      | Give information separately for exposed and unexposed                |       |
| 7  |                  |      | groups if applicable.                                                |       |
| 8  |                  |      |                                                                      |       |
| 9  |                  |      |                                                                      |       |
| 10 | Main results     | #16a | Give unadjusted estimates and, if applicable, confounder-            | 7     |
| 11 |                  |      | adjusted estimates and their precision (eg, 95% confidence           |       |
| 12 |                  |      | interval). Make clear which confounders were adjusted for and        |       |
| 13 |                  |      | why they were included                                               |       |
| 14 |                  |      |                                                                      |       |
| 15 |                  |      |                                                                      |       |
| 16 |                  |      |                                                                      |       |
| 17 |                  | #16b | Report category boundaries when continuous variables were            | 7     |
| 18 |                  |      | categorized                                                          |       |
| 19 |                  |      |                                                                      |       |
| 20 |                  |      |                                                                      |       |
| 21 |                  | #16c | If relevant, consider translating estimates of relative risk into    | NA    |
| 22 |                  |      | absolute risk for a meaningful time period                           |       |
| 23 |                  |      |                                                                      |       |
| 24 | Other analyses   | #17  | Report other analyses done—e.g., analyses of subgroups and           | 8     |
| 25 |                  |      | interactions, and sensitivity analyses                               |       |
| 26 |                  |      |                                                                      |       |
| 27 |                  |      |                                                                      |       |
| 28 | Key results      | #18  | Summarise key results with reference to study objectives             | 9     |
| 29 |                  |      |                                                                      |       |
| 30 |                  |      |                                                                      |       |
| 31 | Limitations      | #19  | Discuss limitations of the study, taking into account sources of     | 10    |
| 32 |                  |      | potential bias or imprecision. Discuss both direction and            |       |
| 33 |                  |      | magnitude of any potential bias.                                     |       |
| 34 |                  |      |                                                                      |       |
| 35 |                  |      |                                                                      |       |
| 36 | Interpretation   | #20  | Give a cautious overall interpretation considering objectives,       | 11-12 |
| 37 |                  |      | limitations, multiplicity of analyses, results from similar studies, |       |
| 38 |                  |      | and other relevant evidence.                                         |       |
| 39 |                  |      |                                                                      |       |
| 40 |                  |      |                                                                      |       |
| 41 | Generalisability | #21  | Discuss the generalisability (external validity) of the study        | 11-12 |
| 42 |                  |      | results                                                              |       |
| 43 |                  |      |                                                                      |       |
| 44 |                  |      |                                                                      |       |
| 45 | Funding          | #22  | Give the source of funding and the role of the funders for the       | 3     |
| 46 |                  |      | present study and, if applicable, for the original study on which    |       |
| 47 |                  |      | the present article is based                                         |       |
| 48 |                  |      |                                                                      |       |
| 49 |                  |      |                                                                      |       |

50  
51 The STROBE checklist is distributed under the terms of the Creative Commons Attribution License  
52 CC-BY. This checklist was completed on 15. June 2018 using <http://www.goodreports.org/>, a tool  
53 made by the [EQUATOR Network](#) in collaboration with [Penelope.ai](#)  
54  
55  
56  
57  
58  
59  
60

# BMJ Open

## Local prevalence of extended-spectrum beta-lactamase (ESBL) producing Enterobacteriaceae intestinal carriers at admission and co-expression of ESBL and OXA-48 carbapenemase in *Klebsiella pneumoniae*: a prevalence survey in a Spanish University Hospital

|                                 |                                                                                                                                                                                                                                                                                                                                                                                                                                                                                                                                                                                                                                                                                                                                                                                                                                                                                                                                                                                                                                                                                                                                                                                                                                                                                                                                                                                                                                                         |
|---------------------------------|---------------------------------------------------------------------------------------------------------------------------------------------------------------------------------------------------------------------------------------------------------------------------------------------------------------------------------------------------------------------------------------------------------------------------------------------------------------------------------------------------------------------------------------------------------------------------------------------------------------------------------------------------------------------------------------------------------------------------------------------------------------------------------------------------------------------------------------------------------------------------------------------------------------------------------------------------------------------------------------------------------------------------------------------------------------------------------------------------------------------------------------------------------------------------------------------------------------------------------------------------------------------------------------------------------------------------------------------------------------------------------------------------------------------------------------------------------|
| Journal:                        | <i>BMJ Open</i>                                                                                                                                                                                                                                                                                                                                                                                                                                                                                                                                                                                                                                                                                                                                                                                                                                                                                                                                                                                                                                                                                                                                                                                                                                                                                                                                                                                                                                         |
| Manuscript ID                   | bmjopen-2018-024879.R1                                                                                                                                                                                                                                                                                                                                                                                                                                                                                                                                                                                                                                                                                                                                                                                                                                                                                                                                                                                                                                                                                                                                                                                                                                                                                                                                                                                                                                  |
| Article Type:                   | Research                                                                                                                                                                                                                                                                                                                                                                                                                                                                                                                                                                                                                                                                                                                                                                                                                                                                                                                                                                                                                                                                                                                                                                                                                                                                                                                                                                                                                                                |
| Date Submitted by the Author:   | 31-Oct-2018                                                                                                                                                                                                                                                                                                                                                                                                                                                                                                                                                                                                                                                                                                                                                                                                                                                                                                                                                                                                                                                                                                                                                                                                                                                                                                                                                                                                                                             |
| Complete List of Authors:       | <p>DIAZ AGERO PEREZ, CRISTINA; Hospital Universitario Ramon y Cajal, Servicio de Medicina Preventiva y Salud Publica; INSTITUTO RAMON Y CAJAL DE INVESTIGACION SANITARIA (IRYCIS)</p> <p>LOPEZ FRESNEÑA, NIEVES; Hospital Universitario Ramon y Cajal, Servicio de Medicina Preventiva y Salud Pública; Instituto Ramón y Cajal de Investigación Sanitaria (IRYCIS)</p> <p>Rincon Carlavilla, Angela; Hospital Universitario Ramon y Cajal, Servicio de Medicina Preventiva y Salud Publica; Instituto Ramón y Cajal de Investigación Sanitaria (IRYCIS)</p> <p>Hernandez Garcia, Marta ; Hospital Universitario Ramon y Cajal, Servicio de Microbiología; Red Española de Investigación en Patología Infecciosa (REIPI)</p> <p>Ruiz-Garbajosa, Patricia; Hospital Universitario Ramon y Cajal, Servicio de Microbiología; Red Española de Investigación en Patología Infecciosa (REIPI)</p> <p>ARANAZ ANDRÉS , JESÚS MARIA; Hospital Universitario Ramon y Cajal, Servicio de Medicina Preventiva y Salud Publica; IRYCIS, INSTITUTO RAMÓN Y CAJAL DE INVESTIGACIÓN SANITARIA</p> <p>Maechler, F; Charite Universitätsmedizin Berlin, Gastmeier, Petra; Charite, Infection Control</p> <p>Bonten, Marc; University Medical Center Utrecht, Department of Medical Microbiology</p> <p>Canton, Rafael; Hospital Universitario Ramón y Cajal, Madrid, Spain, Servicio de Microbiología; Red Española de Investigación en Patología Infecciosa (REIPI)</p> |
| <b>Primary Subject Heading</b>: | Epidemiology                                                                                                                                                                                                                                                                                                                                                                                                                                                                                                                                                                                                                                                                                                                                                                                                                                                                                                                                                                                                                                                                                                                                                                                                                                                                                                                                                                                                                                            |
| Secondary Subject Heading:      | Public health                                                                                                                                                                                                                                                                                                                                                                                                                                                                                                                                                                                                                                                                                                                                                                                                                                                                                                                                                                                                                                                                                                                                                                                                                                                                                                                                                                                                                                           |
| Keywords:                       | Extended-spectrum beta-lactamase producing Enterobacteriaceae, Carbapenemase producing Enterobacteriaceae, Surveillance, Prevalence                                                                                                                                                                                                                                                                                                                                                                                                                                                                                                                                                                                                                                                                                                                                                                                                                                                                                                                                                                                                                                                                                                                                                                                                                                                                                                                     |
|                                 |                                                                                                                                                                                                                                                                                                                                                                                                                                                                                                                                                                                                                                                                                                                                                                                                                                                                                                                                                                                                                                                                                                                                                                                                                                                                                                                                                                                                                                                         |

1  
2  
3  
4  
5  
6  
7  
8  
9  
10  
11  
12  
13  
14  
15  
16  
17  
18  
19  
20  
21  
22  
23  
24  
25  
26  
27  
28  
29  
30  
31  
32  
33  
34  
35  
36  
37  
38  
39  
40  
41  
42  
43  
44  
45  
46  
47  
48  
49  
50  
51  
52  
53  
54  
55  
56  
57  
58  
59  
60

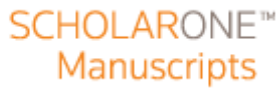

1  
2  
3 1 **TITLE:**

4  
5 2 **Local prevalence of extended-spectrum beta-lactamase (ESBL) producing**  
6  
7 3 ***Enterobacteriaceae* intestinal carriers at admission and co-expression of ESBL**  
8  
9 4 **and OXA-48 carbapenemase in *Klebsiella pneumoniae*: a prevalence survey in a**  
10  
11 5 **Spanish University Hospital**

12  
13  
14 6  
15  
16  
17 7 **Authors:**

18  
19  
20 8 C. Díaz-Agero Pérez<sup>1</sup>, N. López-Fresneña<sup>1</sup>, A.L. Rincón-Carlavilla<sup>1</sup>, M. Hernández-  
21  
22  
23 9 García<sup>2,3</sup>, P. Ruiz-Garbajosa<sup>2,3</sup>, J.M. Aranaz-Andrés<sup>1</sup>, F. Maechler<sup>4</sup>, P. Gastmeier<sup>4</sup>, M.  
24  
25  
26 10 Bonten<sup>5</sup>, R Cantón<sup>2,3</sup>

27  
28  
29  
30 11  
31  
32  
33 12 <sup>1</sup>Servicio de Medicina Preventiva y Salud Pública, Hospital Universitario Ramón y Cajal  
34  
35  
36 13 and Instituto Ramón y Cajal de Investigación Sanitaria (IRYCIS), Madrid, Spain.

37  
38  
39 14 <sup>2</sup>Servicio de Microbiología, Hospital Universitario Ramón y Cajal and Instituto Ramón y  
40  
41  
42 15 Cajal de Investigación Sanitaria (IRYCIS), Madrid, Spain.

43  
44  
45 16 <sup>3</sup>Red Española de Investigación en Patología Infecciosa (REIPI), Madrid, Spain.

46  
47  
48 17 <sup>4</sup>Charité –University Medicine Berlin, Germany.

49  
50  
51 18 <sup>5</sup>University Medical Center Utrecht (UMC Utrecht), Utrecht, The Netherlands.

52  
53  
54 19

55  
56  
57 20 **Corresponding author:**

1  
2  
3 21 Cristina Díaz-Agero Pérez  
4  
5  
6 22 Servicio de Medicina Preventiva y Salud Pública, Hospital Universitario Ramón y Cajal.  
7  
8  
9  
10 23 Carretera de Colmenar Km 9,1. Madrid 28034. Spain  
11  
12  
13 24 email address: cristina.diazagero@salud.madrid.org)  
14  
15  
16 25 Tl.: 0034913368372 / 0034913368604  
17  
18  
19  
20  
21  
22  
23  
24  
25  
26

27  
28  
29 **ABSTRACT**

30 **Objective:** to assess the prevalence of ESBL-producing *Enterobacteriaceae* (ESBL-E)  
31 fecal carriers at admission in a University Hospital in Spain.

32 **Design:** prevalence survey.

33 **Setting:** Pneumology, Gastroenterology, Urology and Neurosurgery units at a  
34 University tertiary hospital in Madrid (Spain).

35 **Participants:** 10,643 patients aged 18 and older admitted from March-2014 to April-  
36 2016 with a rectal swab taken at admission or as soon as possible within the first 48  
37 hours.

38 **Primary and secondary outcome measures:** prevalence of ESBL-E fecal carriers and  
39 prevalence of ESBL-E infections at admission.

1  
2  
3  
4 40 **Results:** the ESBL-E carriers prevalence on admission was 7.69% (CI 95% 7.18-8.19).  
5  
6

7 41 Most of the isolates were *Escherichia coli* (77.51%), followed by *Klebsiella pneumoniae*  
8  
9

10 42 (20.71%). Eighty-eight (10.41%) of ESBL-E were simultaneous ESBL and  
11  
12

13 43 carbapenemase (CP) producers, 1.83% in the case of *E. coli* and 42.86% among *K.*  
14  
15

16 44 *pneumoniae* isolates. Of the ESBL typed, 52.15% belonged to the CTX-M-15 type and  
17  
18

19 45 91.38% of the carbapenemases were OXA-48 type. Only 0.43% patients presented an  
20  
21

22 46 active infection by ESBL-E at admission.  
23  
24

25 47 **Conclusions:** The prevalence found in our study is very similar to that found in the  
26  
27

28 48 literature. However, we found a high percentage of simultaneous ESBL and CP  
29  
30

31 49 producers, particularly in *Klebsiella pneumoniae*. Despite the high prevalence of  
32  
33

34 50 colonized patients, the ESBL-infection rate on admission was very low.  
35  
36

37  
38 51 **Key words:** Extended-spectrum beta-lactamase producing *Enterobacteriaceae*,  
39  
40 52 carbapenemase producing *Enterobacteriaceae*, surveillance, prevalence.  
41  
42

43 53  
44  
45

46 54  
47  
48

49 55  
50  
51

52 56  
53  
54

## 55 57 **ARTICLE SUMMARY**

### 56 58 **Strengths and limitations of this study**

- 57 59 • This study is one of the most prolonged in time and with the largest number of  
58 60 patients assessing colonization with multidrug resistant microorganisms,  
59 61 including adult participants of variable age groups and gender from a university

1  
2  
3 62 hospital providing specialized assistance to 8.51% of the population of Madrid  
4  
5 63 (Spain).

- 6  
7 64 • The large number of patients included (10,643) gives strength to the results.  
8  
9 65 • Genes codifying ESBL and CP were characterized by PCR and sequencing.  
10  
11 66 Unfortunately total characterization was not feasible in all isolates, only 24.67%  
12  
13 67 of total ESBL producing isolates and 73.86% of total CP producing isolates.  
14  
15  
16 68

### 17 18 69 **FUNDING STATEMENT**

- 19  
20 70 • The project falls within the R-GNOSIS study (Resistance of Gram-Negative  
21  
22 71 Organisms: Studying Intervention Strategies), within the Work Package 5  
23  
24 72 Patient isolation strategies for ESBL carriers in medical and surgical hospital  
25  
26 73 wards, funded by the European Union (FP7-HEALTH-2011-SINGLE STAGE-  
27  
28 74 N°282512).  
29  
30 75 • MH-G is supported with a contract from Instituto de Salud Carlos III of Spain  
31  
32 76 (iP-FIS program, ref. IFI14/00022).  
33  
34  
35 77

### 36 37 78 **POTENTIAL CONFLICTS OF INTEREST**

38  
39 79 All authors declare that they have no conflict of interest.  
40  
41 80  
42  
43  
44  
45  
46  
47  
48  
49  
50  
51  
52  
53  
54  
55  
56  
57  
58  
59  
60

1  
2  
3 824 83 **TEXT**5  
6 84 **BACKGROUND**

7  
8 85 The emergence of antimicrobial resistance represents a global challenge for healthcare  
9  
10 86 due to the limited treatment options. Extended-spectrum beta-lactamases (ESBL) are  
11  
12 87 the main mechanisms of acquired resistance in Gram-negative bacteria. Until the late  
13  
14 88 90s most ESBLs were isolated in nosocomial outbreaks, their prevalence was higher in  
15  
16 89 *Klebsiella pneumoniae* than *Escherichia coli*, and there was significant variation among  
17  
18 90 countries, hospitals and wards [1, 2]. They were isolated in higher frequency in the  
19  
20 91 Intensive Care Units (ICU) and recent surgery, catheterization, urinary catheterization,  
21  
22 92 prolonged hospitalization, ICU admission and previous use of cephalosporins and  
23  
24 93 aminoglycosides were leading risk factors [3, 4].

25  
26  
27 94 The situation today is very different since their prevalence has increased dramatically  
28  
29 95 in the community, especially in urinary tract infections, where these enzymes are more  
30  
31 96 frequently isolated in *E. coli* [5-8]. The main clinical relevance of ESBL seems to be the  
32  
33 97 inadequate empirical treatment, delaying the efficient antimicrobial treatment for  
34  
35 98 example up to six times in the case of *E. coli* and *K. pneumoniae* ESBL (i.e., 72 hours  
36  
37 99 instead of 11 hours for susceptible strains) [9, 10]. It is necessary to know the  
38  
39 100 prevalence of microbial resistance in our geographic area and the epidemiological  
40  
41 101 characteristics in order to establish the scope of the problem and analyze its evolution.

42  
43 102 The aim of this study was to assess the prevalence of ESBL-producing  
44  
45 103 *Enterobacteriaceae* (ESBL-E) fecal carriers at admission in hospital wards during an  
46  
47 104 active surveillance screening program (R-GNOSIS project).  
48  
49

50  
51 10552 106 **METHODS**53  
54 107 **Study design and settings**

55  
56 108 The project falls within the R-GNOSIS study (Resistance of Gram-Negative Organisms:  
57  
58 109 Studying Intervention Strategies), within the Work Package 5 Patient isolation  
59  
60



110 strategies for ESBL carriers in medical and surgical hospital wards, funded by the EU  
111 (FP7-HEALTH-2011-SINGLE STAGE-N°282512).

112 The University Hospital Ramón y Cajal is a public referral center, located in the North  
113 of Madrid (Spain). It provides specialized assistance to 558,373 citizens, who represent  
114 8.51% of the population of Madrid. With 1,118 beds, it accounted for 31,179  
115 admissions in year 2014; 31,253 in 2015, and 31,847 in 2016. The Pneumology (41  
116 beds), Gastroenterology (40 beds), Urology (41 beds) and Neurosurgery (20 beds)  
117 wards took part in the study.

### 118 **Patients**

119 Between March 3<sup>rd</sup> 2014 and April 3<sup>rd</sup> 2016, screening rectal swabs were obtained,  
120 after verbal consent, from all patients aged 18 and older, at admission or as soon as  
121 possible within the first 48 hours.

### 122 **Patient involvement**

123 All patients were informed of the aim of the study and the consequences of a positive  
124 result (contact isolation and needing a new rectal screening at any hospital admission  
125 in the future to check their status) and gave their verbal consent to participate; if the  
126 patient refused the swab was not taken. As soon as the microbiological result was  
127 known by the investigators, patients and their familiars were informed.

### 128 **Laboratory analysis**

129 The samples were seeded on ChromoID-ESBL and Chromo-ID CARBA/OXA-48  
130 (BioMérieux, France) selective chromogenic-agar plates. Bacterial identification was  
131 performed using the MALDI-TOF-MS (Bruker-Daltonics, Germany) mass spectrometry.  
132 ESBL and carbapenemase (CP) production were phenotypically confirmed by the  
133 double-disk diffusion test, Hodge Test and KPC/MBL/OXA-48 Confirm and ESBL  
134 AmpC Screen Kits (Rosco Diagnostica, Germany). Antimicrobial susceptibility was  
135 studied with microdilution (MicroScan, Beckman, CA) and gradient strips (Etests,  
136 BioMérieux, France). Genes codifying ESBL (*bla*<sub>SHV</sub>, *bla*<sub>TEM</sub>, *bla*<sub>CTX-M</sub>) and CP (*bla*<sub>VIM</sub>,  
137 *bla*<sub>KPC</sub>, *bla*<sub>NDM</sub>, *bla*<sub>OXA-48</sub>) were characterized by PCR and sequencing.

## 138 **Ethics**

139 The study was carried out in accordance with the Declaration of Helsinki and Good  
140 Clinical Practice Guidelines (ICH-GCP-Guidelines, CPM/ICH/135/95) of the  
141 European Medicines Agency.

142 A waiver of written informed consent of individual patients in the participating wards  
143 was requested. This waiver was granted by the Ethics Committee of Clinical  
144 Research (Comité Ético de Investigación Clínica del Hospital Universitario Ramón y  
145 Cajal, Madrid, Spain) as well as by the Medical Direction on October 2013 (Ref.  
146 251-13), since the study did not expose patients to any novel risk, and no  
147 investigational drugs, devices, or procedures were involved and verbal consent was  
148 considered sufficient.

149 The study included all standard safeguards for ensuring the confidentiality of patient  
150 information and specifications stipulated in the Personal Data Protection Act  
151 15/1999, of 13 December were followed.

152

## 153 **Statistical analyses**

154 A descriptive analysis of the variables collected was conducted, the qualitative  
155 variables were expressed as percentages and the quantitative variables as measures  
156 of central tendency (mean and median) and dispersion (standard deviation). Pearson's  
157 Chi-squared test was used to compare proportions and the Student's T-test to compare  
158 means. All statistics analysis was performed using SPSS Statistics v19 (IBM®)  
159 software.

## 160 **RESULTS**

161 During the research period 12,590 admissions of 9,706 patients took place in the  
162 participating wards. In 84.5% of admissions, a rectal swab could be obtained within the  
163 first 48 hours of admission. Table 1.

164

165 **TABLE 1. Patients admitted to Gastroenterology, Pneumology, Urology and**  
 166 **Neurosurgery wards and patients included in the study.**

| Ward             | Admissions (n) | Swab at admission (n) | %            |
|------------------|----------------|-----------------------|--------------|
| Gastroenterology | 3,380          | 2,916                 | 86.27        |
| Pneumology       | 3,240          | 2,752                 | 84.94        |
| Urology          | 4,685          | 3,963                 | 84.59        |
| Neurosurgery     | 1,285          | 1,012                 | 78.75        |
| <b>Total</b>     | <b>12,590</b>  | <b>10,643</b>         | <b>84.55</b> |

167

168 Gender and mean age of included patients are shown in Table 2.

169

170 **TABLE 2. Age and gender of the included patients.**

| Ward             | Gender               |                      | Age (years)          |                |
|------------------|----------------------|----------------------|----------------------|----------------|
|                  | Men (%)              | Women (%)            | Mean (S.D.)          | Median (I.R.)  |
| Gastroenterology | 1,732 (59.39)        | 1,184 (40.61)        | 66.53 (16.59)        | 69 (26.75)     |
| Pneumology       | 1,625 (59.05)        | 1,127 (40.95)        | 70.72 (15.28)        | 74 (19)        |
| Urology          | 3,009 (75.93)        | 954 (24.07)          | 66.89 (14.56)        | 69 (20)        |
| Neurosurgery     | 533 (52.67)          | 479 (47.33)          | 60.23 (16.52)        | 61 (25)        |
| <b>Total</b>     | <b>6,899 (64.82)</b> | <b>3,744 (35.18)</b> | <b>64.91 (16.79)</b> | <b>67 (25)</b> |

171 S.D.: standard deviation; I.R.: interquartile range.

172

173 The prevalence of ESBL-E fecal carriers at admission was 7.69% (Table 3). Table 3  
 174 shows the distribution of carriers by gender and ward, as well as their age (mean and  
 175 median).

176 The majority of patients colonized with ESBL-E were male, just like the majority of  
 177 hospital patients, the difference not being statistically significant. The mean age of  
 178 colonized patients was higher than the mean age of the total number of hospitalized

1  
2  
3 179 patients (69.27 -S.D.15.68 vs 64.91 -S.D. 16.79-), the difference being statistically  
4  
5 180 significant ( $p = 0.0087$ ).

6  
7 181 The difference in prevalence of colonization at admission among the surveyed wards  
8  
9 182 was statistically significant ( $p = 0.001$ ). The highest prevalence was found in the  
10  
11 183 Gastroenterology ward, with 9.02%, the difference being significant with the rest of  
12  
13 184 wards ( $p = 0.01$ ). When comparing the prevalence between medical wards  
14  
15 185 (Pneumology and Gastroenterology) and surgical wards (Urology and Neurosurgery),  
16  
17 186 the difference was not statistically significant.

18  
19 187 A total of 843 multiresistant *Enterobacteriaceae* were isolated in 818 patients, as 25  
20  
21 188 patients were colonized by more than one microorganism at the time of admission  
22  
23 189 (0.23%). Eighty-eight (10.44%) of the isolated *Enterobacteriaceae* were simultaneous  
24  
25 190 ESBL and carbapenemase (CP) producers, 33.99% of these patients were known  
26  
27 191 carriers, i.e., their clinical records included a previous positive culture for ESBL-E.  
28  
29  
30  
31  
32  
33  
34  
35  
36  
37  
38  
39  
40  
41  
42  
43  
44  
45  
46  
47  
48  
49  
50  
51  
52  
53  
54  
55  
56  
57  
58  
59  
60

192

**TABLE 3. ESBL-producing *Enterobacteriaceae* carriers at admission.**

| Hospital admission<br>wards | Gender             |                    | Age (years)          |                | Prevalence (%) CI 95%   |
|-----------------------------|--------------------|--------------------|----------------------|----------------|-------------------------|
|                             | Men (%)            | Women (%)          | Mean (S.D.)          | Median (I.R.)  |                         |
| Gastroenterology            | 159 (60.23)        | 104 (39.77)        | 66.78 (16.62)        | 67.2 (26.64)   | 9.02 (7.96-10.08)       |
| Pneumology                  | 122 (61.31)        | 77 (38.69)         | 74.78 (14.36)        | 79 (15)        | 7.23 (6.25-8.22)        |
| Urology                     | 234 (80.69)        | 56 (19.31)         | 69.82 (14.04)        | 72 (21)        | 7.32 (6.49-8.14)        |
| Neurosurgery                | 44 (66.67)         | 22 (33.33)         | 62.45 (17.26)        | 66.67 (25.84)  | 6.52 (4.95-8.09)        |
| <b>Total</b>                | <b>559 (68.34)</b> | <b>259 (31.66)</b> | <b>69.27 (15.68)</b> | <b>72 (25)</b> | <b>7.69 (7.18-8.19)</b> |

193

194 ESBL: extended-spectrum beta-lactamases; S.D.: standard deviation; I.R.: interquartile range ; CI: confidence interval.

195

196

1  
2  
3 197 The most frequently isolated ESBL-producer microorganism at admission was *E. coli*  
4  
5 198 (77.70%; -n=655), followed by *K. pneumoniae* (20.64%, n=174), being only 1.66%  
6  
7 199 other species (*E. cloacae* 0.59%; *C. freundii* 0.36%; *E. aerogenes* 0.24%; *C.*  
8  
9 200 *amalonaticus* 0.12%; *C. koseri* 0.12%; *E. asburiae* 0.12%; *K. oxytoca* 0.12%). Among  
10  
11 201 ESBL-*E. coli* isolates, 1.83% were simultaneous ESBL and CP producers (n=12).  
12  
13 202 Among ESBL-*K. pneumoniae* isolates, 43.10% were simultaneous ESBL and CP  
14  
15 203 producers (n=75). Only one patient was colonized by a different ESBL and CP  
16  
17 204 producer, *K. oxytoca*.

18  
19  
20 205 The typing of 208 beta-lactamases (24.67% of total ESBL) and 65 carbapenemases  
21  
22 206 was possible (73.86% of total CP). Most of ESBL (83.17%) belonged to the CTX-M  
23  
24 207 group, CTX-M-15 being the most numerous, followed by CTX-M-14. The remaining  
25  
26 208 16.83% belonged to the SHV group, SHV-12 being the most frequent (Table 4). For the  
27  
28 209 typed CP, 90.77% were OXA-48 type (Table 5). In the case of 4 patients colonized  
29  
30 210 simultaneously by 2 different ESBL-E (in 2 patients ESBL-*E. coli* and ESBL-*K.*  
31  
32 211 *pneumoniae* and in the other ESBL+CP-*E. coli* and ESBL+CP-*K. pneumoniae*  
33  
34 212 respectively), both microorganisms carried the same enzyme type, CTX-M-15 in 3 of  
35  
36 213 them and CTX-M-14 in 1, and OXA-48 in the case of CP.

37  
38  
39 214

40  
41 215

42  
43 216

44  
45 217

46  
47 218

48  
49 219

50  
51 220

52  
53 221

54  
55 222

56  
57 223

58  
59 224  
60

225 **TABLE 4. Distribution of ESBL strains isolated and typed in rectal swabs at**  
 226 **hospital admission**

| Enzyme       | Microorganism          |                          |                           |                            |                            |                              | Total (%)           |
|--------------|------------------------|--------------------------|---------------------------|----------------------------|----------------------------|------------------------------|---------------------|
|              | ESBL<br><i>E. coli</i> | ESBL<br><i>K. pneum.</i> | ESBL<br><i>E. cloacae</i> | ESBL<br><i>C. freundii</i> | ESBL +CP<br><i>E. coli</i> | ESBL +CP<br><i>K. pneum.</i> |                     |
| CTX-M        | 1                      | -                        | -                         | -                          | -                          | -                            | <b>1 (0.48%)</b>    |
| CTX-M-1      | 10                     | 4                        | -                         | -                          | -                          | -                            | <b>14 (6.73%)</b>   |
| CTX-M-9      | 10                     | 3                        | -                         | -                          | -                          | -                            | <b>13 (6.25%)</b>   |
| CTX-M-14     | 23                     | 1                        | -                         | -                          | -                          | 2                            | <b>26 (12.50%)</b>  |
| CTX-M-15     | 35                     | 31                       | 1                         | -                          | 3                          | 40                           | <b>110 (52.88%)</b> |
| CTX-M-27     | 6                      | -                        | -                         | -                          | -                          | -                            | <b>6 (2.88%)</b>    |
| CTX-M-32     | 2                      | -                        | -                         | -                          | -                          | -                            | <b>2 (0.96%)</b>    |
| CTX-M-55     | 1                      | -                        | -                         | -                          | -                          | -                            | <b>1 (0.48%)</b>    |
| SHV          | 1                      | 1                        | -                         | -                          | -                          | -                            | <b>2 (0.96%)</b>    |
| SHV-2        | 1                      | 1                        | -                         | -                          | -                          | -                            | <b>2 (0.96%)</b>    |
| SHV-12       | 10                     | 8                        | -                         | 1                          | -                          | 5                            | <b>24 (11.54%)</b>  |
| SHV-28       | -                      | 5                        | -                         | -                          | -                          | 1                            | <b>6 (2.88%)</b>    |
| SHV-31       | -                      | 1                        | -                         | -                          | -                          | -                            | <b>1 (0.48%)</b>    |
| <b>Total</b> | <b>100</b>             | <b>55</b>                | <b>1</b>                  | <b>1</b>                   | <b>2</b>                   | <b>48</b>                    | <b>208 (100%)</b>   |

227

228 ESBL: Extended-spectrum beta-lactamases; CP: carbapenemase.

229

230

231

232

233

234

235

236

237 **TABLE 5. Distribution of carbapenemase strains isolated and typed in rectal**  
 238 **swabs at hospital admission**

| Enzyme | Microorganism              |                                  |             |
|--------|----------------------------|----------------------------------|-------------|
|        | ESBL +CP<br><i>E. coli</i> | ESBL +CP<br><i>K. pneumoniae</i> | Total (%)   |
| KPC-3  | 1                          | -                                | 1 (1.54%)   |
| NDM-1  | -                          | 1                                | 1 (1.54%)   |
| OXA-48 | 11                         | 48                               | 59 (90.77%) |
| VIM-1  | -                          | 4                                | 4 (6.15%)   |
| Total  | 12                         | 53                               | 65 (100%)   |

239

240 ESBL: Extended-spectrum beta-lactamases; CP: carbapenemase

241

242 Fifty-four patients presented an active infection by ESBL-E at admission, i.e., 0.43% of  
 243 patients admitted during the research period and 6.6% of ESBL-E intestinal carriers. Of  
 244 those 54 patients, all except one also showed a positive rectal swab, 90.74% of those  
 245 (49 patients) with the same specie causing the infection, and 9.26% (5 patients) with a  
 246 different ESBL-E. Out of the diagnosed infections, 69.09% (38 urine cultures) were  
 247 urinary tract infections, 14.55% bacteraemia (n=8; 1 of them secondary to a  
 248 urinary tract infection), two community acquired pneumonias (3.64%), 2 surgical site  
 249 infections (3.64%), 2 abscesses (3.64%), 1 lower respiratory infection (1.82%), 1  
 250 gastrostomy insertion site infection (1.82%), and 1 Fournier's gangrene (1.82%).

251 A total of 56 microorganisms were isolated in the 55 positive clinical cultures, as one of  
 252 them was positive for two ESBL-E. The most frequently isolated microorganism was  
 253 once again *E. coli* (67.86%), followed by ESBL and CP-*K. pneumoniae* (23.21%),  
 254 ESBL-*K. pneumoniae* (7.14%); *K. oxytoca* was isolated in 1 culture (1.79%).

255

## 256 DISCUSSION



1  
2  
3 257 In our study, the prevalence of ESBL-E carriers at admission was 7.69%, ranging  
4  
5 258 between 6.52% and 9.02% depending on the ward. The prevalence of ESBL-E carriers  
6  
7 259 in healthy individuals as well as in ambulatory and hospitalized patients has been  
8  
9 260 researched in a number of studies. In all of them, *E. coli* is always the most frequently  
10  
11 261 isolated microorganism, similarly to our study (77.70%) [11-19]. In a meta-analysis  
12  
13 262 published in 2016 which analyzed prevalence studies in healthy persons, and included  
14  
15 263 28,909 individuals from 66 studies, the mean global prevalence of colonization was  
16  
17 264 14%, with great variability among regions [19]. It was higher in Asia, with 46% and  
18  
19 265 Africa with 22%; in Europe the mean prevalence was 4%, with 3% in Central Europe,  
20  
21 266 4% in Northern Europe and 6% in Southern Europe. Finally, in America, the mean  
22  
23 267 prevalence was 2%, although it was admitted that there were very few studies for this  
24  
25 268 region [20].

26  
27  
28 269 Our prevalence of intestinal carriers at admission is virtually the same to that found by  
29  
30 270 a Dutch study recently published, which was 7.9% in patients coming from their homes  
31  
32 271 and 8.6% in patients coming from long-term care facilities, a distinction not made in our  
33  
34 272 research [21]. Studies in three different areas in Spain (Madrid, Barcelona and  
35  
36 273 Zaragoza) show that the prevalence of carriers has increased in the last years,  
37  
38 274 reaching rates ranging from 5.5% and 8.1% in 2002 and 2004, similarly to our study  
39  
40 275 findings [11, 13, 16]. In another study performed in Seville, the prevalence of carriers  
41  
42 276 among patients admitted to Emergency Units was 7.4%, also very similar to our figure  
43  
44 277 [22].

45  
46  
47 278 In our facility, 10.44% of ESBL microorganisms were simultaneous carbapenemase  
48  
49 279 producers, being 85.22% *K. pneumoniae*, 13.64% *E. coli* and 1.14 *K. oxytoca*. Of the  
50  
51 280 65 carbapenemases typed (73.86% of total CP), the vast majority of them, 90.77%  
52  
53 281 belonged to the OXA-48 type. This fact is especially important in the case of *K.*  
54  
55 282 *pneumoniae* with 43.10% of them being ESBL and CP producers (90.57% OXA-48).  
56  
57 283 ESBL and CP *K. pneumoniae* was responsible for 23.21% of the infections diagnosed  
58  
59  
60

1  
2  
3 284 at hospital admission (69.27% of them urinary tract infections). We did not find a similar  
4  
5 285 study to compare our data with but we think this finding must be deeply analyzed.  
6

7 286

8  
9 287 Male gender has been identified as a risk factor for the intestinal colonization by ESBL-  
10  
11 288 E [7, 20, 21, 23, 24]. In our study, as in Valverde et al., the majority of colonized  
12  
13 289 patients were men, but they were also the majority of the total number of hospitalized  
14  
15 290 patients, the difference not being statistically significant [11]. Age is another risk factor  
16  
17 291 identified in the bibliography; in our study, the mean age of colonized patients was  
18  
19 292 higher than the mean age of hospitalized patients (69.27 years vs 64.91 years), being  
20  
21 293 the difference statistically significant in this case ( $p = 0.0087$ ) [23, 24].  
22  
23

24 294 The prevalence of carriers at admission was higher in the Gastroenterology ward,  
25  
26 295 despite being younger than the mean, with a difference statistically significant as  
27  
28 296 compared to the rest of included wards. In other published studies, liver disease has  
29  
30 297 been identified as a risk factor for intestinal colonization by ESBL-E, being the  
31  
32 298 prophylactic use of fluoroquinolones to prevent spontaneous bacterial peritonitis in  
33  
34 299 patients with chronic liver disease one of the possible explanations [25, 26]. Another  
35  
36 300 risk factor for ESBL-E carriage recently described in the literature is proton pump  
37  
38 301 inhibitors (PPI) use, and these type of patients are often receiving PPIs and other  
39  
40 302 medication for gastroesophageal reflux disease [27, 28]. In our case, we cannot provide  
41  
42 303 an explanation as risk factors for every patient were not recorded.  
43  
44

45 304 Unfortunately total characterization was not feasible in all isolates due to budget issues  
46  
47 305 so we decided to analyze a random selection. We were able to determine 24.67% of  
48  
49 306 total ESBL producing isolates; that low percentage is a limitation of our study and the  
50  
51 307 results could differ if all the ESBLs had been analyzed but they are compatible with the  
52  
53 308 epidemiology described in the literature. The main enzyme group was CTX-M, the most  
54  
55 309 common according to the literature, followed by SHV, CTX-M-15 group prevailing with  
56  
57 310 52.88% [8, 12-14, 19, 21, 22, 24].  
58  
59

60 311

1  
2  
3 312 In the last years, ESBL-E infections have become an increasing concern; in the United  
4  
5 313 States for example 140,000 hospital-acquired ESBL-E infections are estimated to occur  
6  
7 314 per year [29]. Infections by these bacteria are associated to higher mortality rates and  
8  
9 315 higher hospital costs compared to antibiotic-sensitive microorganisms [30]. However,  
10  
11 316 few studies have associated the fact of being an intestinal carrier of ESBL-E with the  
12  
13 317 development of infections caused by these bacteria. A recent cohort study performed in  
14  
15 318 patients with haematological malignancies found a 3.5-fold greater risk of developing  
16  
17 319 bacteraemia by ESBL-E among colonized patients when compared to non-colonized  
18  
19 320 patients; despite of the fact that mortality was similar in both groups, colonization was  
20  
21 321 associated to longer hospital stays, shorter survival period and higher costs [31]. On  
22  
23 322 the contrary, another similar study did not find correlation between ESBL-E colonization  
24  
25 323 and infection in neutropenic patients [32]. In our study 55 ESBL-E infections were  
26  
27 324 diagnosed at admission and almost 70% were urinary tract infections. That means that  
28  
29 325 0.43% of patients were admitted with an ESBL-E infection, which represents 6.59% of  
30  
31 326 the colonized patients. Only in one patient with ESBL-E infection at admission no  
32  
33 327 ESBL-E was isolated in the rectal swabs. Even though the vast majority of infections  
34  
35 328 were found in colonized patients, the total prevalence of infection is very low, and only  
36  
37 329 in 8 cases it consisted of bacteraemia (1 of those secondary to a urinary tract  
38  
39 330 infection). In two cases patients died during hospital admission, although their infection  
40  
41 331 had been fully resolved and death was caused by an underlying oncological disease.  
42  
43 332 This study, one of the most prolonged in time and with the largest number of patients,  
44  
45 333 confirms once again the extension of ESBL-E intestinal colonization in the community  
46  
47 334 showing, however, a low prevalence of infection. It is necessary to continue with the  
48  
49 335 epidemiological surveillance of these microorganisms, in order to acquire a better  
50  
51 336 knowledge of the implications of being an intestinal carrier of ESBL-E. The high  
52  
53 337 percentage of ESBL and CP *K. pneumoniae* producers must also be more deeply  
54  
55 338 studied.  
56  
57  
58  
59  
60 339

1  
2  
3 340 **WORD COUNT**  
4

5 341 2,450  
6  
7 342

8  
9 343 **AUTHOR CONTRIBUTIONS**

10 344 **Conception and design of study:** M Bonten, R Cantón, P Gastemeier, F Maechler.  
11  
12 345

13 346 **Data collection:** C Díaz-Agero Pérez, N López-Fresneña, AL Rincón-Carlavilla, M  
14 347 Hernández-García, P Ruiz-Garbajosa.

15 348 **Analysis and/or interpretation of data:** C Díaz-Agero Pérez, N López-Fresneña, AL  
16 349 Rincón-Carlavilla, M Hernández-García, P Ruiz-Garbajosa, JM Aranaz-Andrés, R  
17 350 Cantón.  
18  
19  
20  
21 351

22  
23 352 **Drafting the manuscript:** C Díaz-Agero Pérez, N López-Fresneña, AL Rincón-  
24 353 Carlavilla, M Hernández-García.  
25  
26 354

27  
28 355 **Revising the manuscript critically for important intellectual content:** R Cantón, P  
29 356 Ruiz-Garbajosa, JM Aranaz-Andrés, M Bonten, P Gastemeier, F Maechler.  
30  
31 357

32 358 **Approval of the version of the manuscript to be published:** C Díaz-Agero Pérez, N  
33 359 López-Fresneña, AL Rincón-Carlavilla, M. Hernández-García, P. Ruiz-Garbajosa, JM  
34 360 Aranaz-Andrés, F Maechler, P Gastmeier, M Bonten, R Cantón.  
35  
36  
37 361

38  
39 362 **DATA SHARING STATEMENT**  
40

41 363 Extra data is available by emailing: [cristina.diazagero@salud.madrid.org](mailto:cristina.diazagero@salud.madrid.org)  
42 364  
43  
44 365  
45  
46

47 366 **AKNOWLEDGEMENTS**  
48  
49

50 367 **Previous presentation:** preliminary results from this study were presented at ECCMID  
51  
52  
53

54 368 2016 on April 11, 2016, Amsterdam, the Netherlands.  
55  
56  
57 369  
58 370

59 371 **REFERENCES**  
60

- 1  
2  
3 372 1. Winokur PL et al. Variations in the prevalence of strains expressing an extended-  
4  
5 373 spectrum beta-lactamase phenotype and characterization of isolates from Europe, the  
6  
7 374 Americas, and the Western Pacific region. *Clinical Infectious Diseases*. 2001; 32:94-  
8  
9 375 103.
- 10  
11 376 2. Babini GS, Livermore DM. Antimicrobial resistance amongst *Klebsiella* spp. collected  
12  
13 377 from intensive care units in Southern and Western Europe in 1997-1998. *Journal of*  
14  
15 378 *Antimicrobial Chemotherapy*. 2000; 45:183-189.
- 16  
17 379 3. Paterson DL, Bonomo RA. Extended-spectrum beta-lactamases: a clinical update.  
18  
19 380 *Clinical Microbiology Reviews*. 2005; 18: 657-686.
- 20  
21 381 4. Sirot D. Extended-spectrum plasmid-mediated beta-lactamases. *Journal of*  
22  
23 382 *Antimicrobial Chemotherapy*. 1995; 36:19-34.
- 24  
25 383 5. Pitout JD et al. Population-based laboratory surveillance for *Escherichia coli*-  
26  
27 384 producing extended-spectrum betalactamases: importance of community isolates with  
28  
29 385 blaCTX-M genes. *Clinical Infectious Diseases*. 2004; 38:1736-1741.
- 30  
31 386 6. Rodríguez-Baño J et al. Bacteremia due to extended-spectrum beta -lactamase-  
32  
33 387 producing *Escherichia coli* in the CTX-M era: a new clinical challenge. *Clinical*  
34  
35 388 *Infectious Diseases*. 2006; 43:1407-1414.
- 36  
37 389 7. Ben-Ami R et al. Influx of extended-spectrum beta-lactamase-producing  
38  
39 390 Enterobacteriaceae into the hospital. *Clinical Infectious Diseases*. 2006; 42: 925-934.
- 40  
41 391 8. Woerther PL et al. Trends in human fecal carriage of extended-spectrum beta-  
42  
43 392 lactamases in the community: Toward the globalization of CTX-M. *Clinical Microbiology*  
44  
45 393 *Reviews*. 2013; 26: 744–758.
- 46  
47 394 9. García E et al. Bacteriemias por *Escherichia coli* productor de betalactamasas de  
48  
49 395 espectro extendido (BLEE): Significación clínica y perspectivas actuales. España.  
50  
51 396 *Revista Española de Quimioterapia*. 2011; 24: 57-66.
- 52  
53 397 10. Lautenbach E et al. Extended-spectrum beta-lactamase-producing *Escherichia coli*  
54  
55 398 and *Klebsiella pneumoniae*: risk factors for infection and impact of resistance on  
56  
57 399 outcomes. *Clinical Infectious Diseases*. 2001; 32: 1162-1171.

- 1  
2  
3 400 11. Valverde A et al. Dramatic increase in prevalence of fecal carriage of extended-  
4  
5 401 spectrum b-lactamase-producing *Enterobacteriaceae* during nonoutbreak situations in  
6  
7 402 Spain. *Journal of Clinical Microbiology*. 2004; 42: 4769–4775.  
8  
9 403 12. Munday CJ et al. Predominance and genetic diversity of community- and hospital-  
10  
11 404 acquired CTX-M extended-spectrum b-lactamases in York, UK. *Journal of Antimicrobial*  
12  
13 405 *Chemotherapy*. 2004; 54: 628–633.  
14  
15 406 13. Miró E et al. Surveillance of extended spectrum b-lactamases from clinical samples  
16  
17 407 and faecal carriers in Barcelona, Spain. *Journal of Antimicrobial Chemotherapy*. 2005;  
18  
19 408 56: 1152–1155.  
20  
21 409 14. Moubareck C et al. Countrywide spread of community- and hospital-acquired  
22  
23 410 extended-spectrum b-lactamase (CTX-M-15)-producing *Enterobacteriaceae* in  
24  
25 411 Lebanon. *Journal of Clinical Microbiology*. 2005; 43: 3309–3313.  
26  
27 412 15. Rodrigues C et al. Extended-spectrum b-lactamase-producing flora in healthy  
28  
29 413 persons. *Emerging Infectious Diseases*. 2005; 11: 981–982.  
30  
31 414 16. Castillo García FJ et al. Prevalence of fecal carriage of ESBL-producing  
32  
33 415 *Enterobacteriaceae* in hospitalized and ambulatory patients during two non-outbreak  
34  
35 416 periods. *European Journal of Clinical Microbiology & Infectious Diseases*. 2007; 26:  
36  
37 417 77–78.  
38  
39 418 17. Kader AA, Kumar A, Kamath KA. Fecal carriage of extended spectrum b-  
40  
41 419 lactamase-producing *Escherichia coli* and *Klebsiella pneumoniae* in patients and  
42  
43 420 asymptomatic healthy individuals. *Infection Control & Hospital Epidemiology*. 2007; 28:  
44  
45 421 1114–1146.  
46  
47 422 18. Pallecchi L et al. Rapid dissemination and diversity of CTX-M extended-spectrum  
48  
49 423 b-lactamase genes in comensal *Escherichia coli* isolates from healthy children from  
50  
51 424 low-resource settings in Latin America. *Antimicrobial Agents and Chemotherapy*.  
52  
53 425 2007; 51: 2720–2725.  
54  
55  
56  
57  
58  
59  
60

- 1  
2  
3 426 19. Karanika S et al. Fecal colonization with extended-spectrum beta-lactamase-  
4  
5 427 producing *Enterobacteriaceae* and risk factors among healthy individuals: a systematic  
6  
7 428 review and metaanalysis. *Clinical Infectious Diseases*. 2016; 63:310-318.  
8  
9 429 20. Shitrit P et al. Extended-spectrum beta-lactamase-producing *Enterobacteriaceae*  
10  
11 430 carriage upon hospital admission: prevalence and risk factors. *Journal of Hospital*  
12  
13 431 *Infection*. 2013; 85: 230-232.  
14  
15 432 21. Platteel TN et al. Predicting carriage with extended-spectrum beta-lactamase-  
16  
17 433 producing bacteria at hospital admission: a cross-sectional study. *Clinical Microbiology*  
18  
19 434 *and Infection*. 2015; 21: 141–146.  
20  
21 435 22. Rodríguez-Baño J et al. Faecal carriage of extended-spectrum beta-lactamase-  
22  
23 436 producing *Escherichia coli*: prevalence, risk factors and molecular epidemiology.  
24  
25 437 *Journal of Antimicrobial Chemotherapy*. 2008; 62: 1142-1149.  
26  
27 438 23. Ruppé E et al. Clinical predictive values of extended-spectrum beta-lactamase  
28  
29 439 carriage in patients admitted to medical wards. *European Journal of Clinical*  
30  
31 440 *Microbiology & Infectious Diseases*. 2012; 31: 319–325.  
32  
33 441 24. Ben-Ami R et al. A multinational survey of risk factors for infection with extended-  
34  
35 442 spectrum beta-lactamase-producing enterobacteriaceae in nonhospitalized  
36  
37 443 patients. *Clinical Infectious Diseases*. 2009; 49: 682–690.  
38  
39 444 25. Pasricha J. Carriage of extended-spectrum beta-lactamase-producing  
40  
41 445 *Enterobacteriaceae* among internal medicine patients in Switzerland. *Antimicrobial*  
42  
43 446 *Resistance & Infection Control*. 2013; 2: 20.  
44  
45 447 26. Han JH et al. Risk factors for gastrointestinal tract colonization with extended-  
46  
47 448 spectrum beta-lactamase (ESBL)-producing *Escherichia coli* and *Klebsiella* species in  
48  
49 449 hospitalized patients. *Infection Control & Hospital Epidemiology*. 2012; 33:1242–1245.  
50  
51 450 27. Hamprecht A et al. Colonization with third-generation cephalosporin-resistant  
52  
53 451 *Enterobacteriaceae* on hospital admission: prevalence and risk factors. *Journal of*  
54  
55 452 *Antimicrobial Chemotherapy*. 2016; 71: 2957-2963.  
56  
57  
58  
59  
60

- 1  
2  
3 453 28. Huizinga P et al. Proton Pump Inhibitor use is associated with extended-spectrum  
4  
5 454  $\beta$ -lactamase-producing *Enterobacteriaceae* rectal carriage at hospital admission: a  
6  
7 455 cross-sectional study. *Clinical Infectious Diseases*. 2017; 64: 361-363.  
8  
9 456 29. Centers for Disease Control and Prevention (2013). Antibiotic Resistance Threats  
10  
11 457 in the United States. U.S. Department of Health and Human Services; Centers for  
12  
13 458 Disease Control and Prevention. [http://www.cdc.gov/drugresistance/pdf/ar-threats-](http://www.cdc.gov/drugresistance/pdf/ar-threats-2013-508.pdf)  
14  
15 459 [2013-508.pdf](http://www.cdc.gov/drugresistance/pdf/ar-threats-2013-508.pdf). Accessed 12 December 2017.  
16  
17 460 30. Stewardson AJ et al. The health and economic burden of bloodstream infections  
18  
19 461 caused by antimicrobial susceptible and non-susceptible *Enterobacteriaceae* and  
20  
21 462 *Staphylococcus aureus* in European hospitals, 2010 and 2011: a multicentre  
22  
23 463 retrospective cohort study. *Eurosurveillance* 21. doi: 10.2807/1560-  
24  
25 464 7917.ES.2016.21.33.30319.  
26  
27 465 31. Cornejo-Juárez P et al. Fecal ESBL *Escherichia coli* carriage as a risk factor for  
28  
29 466 bacteremia in patients with hematological malignancies. *Supportive Care in Cancer*.  
30  
31 467 2016; 24:253–259.  
32  
33 468 32. Arnan M et al. Risk factors for, and clinical relevance of, faecal extended spectrum  
34  
35 469 beta-lactamase producing *Escherichia coli* (ESBL-EC) carriage in neutropenic patients  
36  
37 470 with haematological malignancies. *European Journal of Clinical Microbiology&*  
38  
39 471 *Infectious Diseases*. 2011; 30:355–360.  
40  
41  
42  
43  
44  
45  
46  
47  
48  
49  
50  
51  
52  
53  
54  
55  
56  
57  
58  
59  
60



# Reporting checklist for cross sectional study.

Based on the STROBE cross sectional guidelines.

## Instructions to authors

Complete this checklist by entering the page numbers from your manuscript where readers will find each of the items listed below.

Your article may not currently address all the items on the checklist. Please modify your text to include the missing information. If you are certain that an item does not apply, please write "n/a" and provide a short explanation.

Upload your completed checklist as an extra file when you submit to a journal.

In your methods section, say that you used the STROBE cross sectional reporting guidelines, and cite them as:

von Elm E, Altman DG, Egger M, Pocock SJ, Gotsche PC, Vandenbroucke JP. The Strengthening the Reporting of Observational Studies in Epidemiology (STROBE) Statement: guidelines for reporting observational studies.

|                        |     | Reporting Item                                                                                                                  | Page Number |
|------------------------|-----|---------------------------------------------------------------------------------------------------------------------------------|-------------|
| Title                  | #1a | Indicate the study's design with a commonly used term in the title or the abstract                                              | 2           |
| Abstract               | #1b | Provide in the abstract an informative and balanced summary of what was done and what was found                                 | 2           |
| Background / rationale | #2  | Explain the scientific background and rationale for the investigation being reported                                            | 4           |
| Objectives             | #3  | State specific objectives, including any prespecified hypotheses                                                                | 5           |
| Study design           | #4  | Present key elements of study design early in the paper                                                                         | 5           |
| Setting                | #5  | Describe the setting, locations, and relevant dates, including periods of recruitment, exposure, follow-up, and data collection | 5           |
| Eligibility criteria   | #6a | Give the eligibility criteria, and the sources and methods of selection of participants.                                        | 5           |

|    |                  |      |                                                                   |    |
|----|------------------|------|-------------------------------------------------------------------|----|
| 1  |                  | #7   | Clearly define all outcomes, exposures, predictors, potential     | 6  |
| 2  |                  |      | confounders, and effect modifiers. Give diagnostic criteria, if   |    |
| 3  |                  |      | applicable                                                        |    |
| 4  |                  |      |                                                                   |    |
| 5  |                  |      |                                                                   |    |
| 6  | Data sources /   | #8   | For each variable of interest give sources of data and details of | 6  |
| 7  | measurement      |      | methods of assessment (measurement). Describe                     |    |
| 8  |                  |      | comparability of assessment methods if there is more than one     |    |
| 9  |                  |      | group. Give information separately for for exposed and            |    |
| 10 |                  |      | unexposed groups if applicable.                                   |    |
| 11 |                  |      |                                                                   |    |
| 12 |                  |      |                                                                   |    |
| 13 |                  |      |                                                                   |    |
| 14 | Bias             | #9   | Describe any efforts to address potential sources of bias         | 6  |
| 15 |                  |      |                                                                   |    |
| 16 |                  |      |                                                                   |    |
| 17 | Study size       | #10  | Explain how the study size was arrived at                         | 7  |
| 18 |                  |      |                                                                   |    |
| 19 | Quantitative     | #11  | Explain how quantitative variables were handled in the            | 6  |
| 20 | variables        |      | analyses. If applicable, describe which groupings were chosen,    |    |
| 21 |                  |      | and why                                                           |    |
| 22 |                  |      |                                                                   |    |
| 23 |                  |      |                                                                   |    |
| 24 | Statistical      | #12a | Describe all statistical methods, including those used to control | 6  |
| 25 | methods          |      | for confounding                                                   |    |
| 26 |                  |      |                                                                   |    |
| 27 |                  |      |                                                                   |    |
| 28 |                  | #12b | Describe any methods used to examine subgroups and                | 6  |
| 29 |                  |      | interactions                                                      |    |
| 30 |                  |      |                                                                   |    |
| 31 |                  |      |                                                                   |    |
| 32 |                  | #12c | Explain how missing data were addressed                           | NA |
| 33 |                  |      |                                                                   |    |
| 34 |                  | #12d | If applicable, describe analytical methods taking account of      | NA |
| 35 |                  |      | sampling strategy                                                 |    |
| 36 |                  |      |                                                                   |    |
| 37 |                  |      |                                                                   |    |
| 38 |                  | #12e | Describe any sensitivity analyses                                 | NA |
| 39 |                  |      |                                                                   |    |
| 40 |                  |      |                                                                   |    |
| 41 | Participants     | #13a | Report numbers of individuals at each stage of study—eg           | 7  |
| 42 |                  |      | numbers potentially eligible, examined for eligibility, confirmed |    |
| 43 |                  |      | eligible, included in the study, completing follow-up, and        |    |
| 44 |                  |      | analysed. Give information separately for for exposed and         |    |
| 45 |                  |      | unexposed groups if applicable.                                   |    |
| 46 |                  |      |                                                                   |    |
| 47 |                  |      |                                                                   |    |
| 48 |                  |      |                                                                   |    |
| 49 |                  | #13b | Give reasons for non-participation at each stage                  | 7  |
| 50 |                  |      |                                                                   |    |
| 51 |                  | #13c | Consider use of a flow diagram                                    | NA |
| 52 |                  |      |                                                                   |    |
| 53 |                  |      |                                                                   |    |
| 54 | Descriptive data | #14a | Give characteristics of study participants (eg demographic,       | 7  |
| 55 |                  |      | clinical, social) and information on exposures and potential      |    |
| 56 |                  |      | confounders. Give information separately for exposed and          |    |
| 57 |                  |      | unexposed groups if applicable.                                   |    |
| 58 |                  |      |                                                                   |    |
| 59 |                  |      |                                                                   |    |
| 60 |                  |      |                                                                   |    |

|    |                  |      |                                                                      |       |
|----|------------------|------|----------------------------------------------------------------------|-------|
| 1  |                  | #14b | Indicate number of participants with missing data for each           | 7     |
| 2  |                  |      | variable of interest                                                 |       |
| 3  |                  |      |                                                                      |       |
| 4  |                  |      |                                                                      |       |
| 5  | Outcome data     | #15  | Report numbers of outcome events or summary measures.                | 7     |
| 6  |                  |      | Give information separately for exposed and unexposed                |       |
| 7  |                  |      | groups if applicable.                                                |       |
| 8  |                  |      |                                                                      |       |
| 9  |                  |      |                                                                      |       |
| 10 | Main results     | #16a | Give unadjusted estimates and, if applicable, confounder-            | 7     |
| 11 |                  |      | adjusted estimates and their precision (eg, 95% confidence           |       |
| 12 |                  |      | interval). Make clear which confounders were adjusted for and        |       |
| 13 |                  |      | why they were included                                               |       |
| 14 |                  |      |                                                                      |       |
| 15 |                  |      |                                                                      |       |
| 16 |                  |      |                                                                      |       |
| 17 |                  | #16b | Report category boundaries when continuous variables were            | 7     |
| 18 |                  |      | categorized                                                          |       |
| 19 |                  |      |                                                                      |       |
| 20 |                  |      |                                                                      |       |
| 21 |                  | #16c | If relevant, consider translating estimates of relative risk into    | NA    |
| 22 |                  |      | absolute risk for a meaningful time period                           |       |
| 23 |                  |      |                                                                      |       |
| 24 | Other analyses   | #17  | Report other analyses done—e.g., analyses of subgroups and           | 8     |
| 25 |                  |      | interactions, and sensitivity analyses                               |       |
| 26 |                  |      |                                                                      |       |
| 27 |                  |      |                                                                      |       |
| 28 | Key results      | #18  | Summarise key results with reference to study objectives             | 9     |
| 29 |                  |      |                                                                      |       |
| 30 |                  |      |                                                                      |       |
| 31 | Limitations      | #19  | Discuss limitations of the study, taking into account sources of     | 10    |
| 32 |                  |      | potential bias or imprecision. Discuss both direction and            |       |
| 33 |                  |      | magnitude of any potential bias.                                     |       |
| 34 |                  |      |                                                                      |       |
| 35 |                  |      |                                                                      |       |
| 36 | Interpretation   | #20  | Give a cautious overall interpretation considering objectives,       | 11-12 |
| 37 |                  |      | limitations, multiplicity of analyses, results from similar studies, |       |
| 38 |                  |      | and other relevant evidence.                                         |       |
| 39 |                  |      |                                                                      |       |
| 40 |                  |      |                                                                      |       |
| 41 | Generalisability | #21  | Discuss the generalisability (external validity) of the study        | 11-12 |
| 42 |                  |      | results                                                              |       |
| 43 |                  |      |                                                                      |       |
| 44 |                  |      |                                                                      |       |
| 45 | Funding          | #22  | Give the source of funding and the role of the funders for the       | 3     |
| 46 |                  |      | present study and, if applicable, for the original study on which    |       |
| 47 |                  |      | the present article is based                                         |       |
| 48 |                  |      |                                                                      |       |
| 49 |                  |      |                                                                      |       |

50  
51 The STROBE checklist is distributed under the terms of the Creative Commons Attribution License  
52 CC-BY. This checklist was completed on 15. June 2018 using <http://www.goodreports.org/>, a tool  
53 made by the [EQUATOR Network](#) in collaboration with [Penelope.ai](#)  
54  
55  
56  
57  
58  
59  
60

# BMJ Open

## Local prevalence of extended-spectrum beta-lactamase (ESBL) producing Enterobacteriaceae intestinal carriers at admission and co-expression of ESBL and OXA-48 carbapenemase in *Klebsiella pneumoniae*: a prevalence survey in a Spanish University Hospital

|                                 |                                                                                                                                                                                                                                                                                                                                                                                                                                                                                                                                                                                                                                                                                                                                                                                                                                                                                                                                                                                                                                                                                                                                                                                                                                                                                                                                                                                                                                                         |
|---------------------------------|---------------------------------------------------------------------------------------------------------------------------------------------------------------------------------------------------------------------------------------------------------------------------------------------------------------------------------------------------------------------------------------------------------------------------------------------------------------------------------------------------------------------------------------------------------------------------------------------------------------------------------------------------------------------------------------------------------------------------------------------------------------------------------------------------------------------------------------------------------------------------------------------------------------------------------------------------------------------------------------------------------------------------------------------------------------------------------------------------------------------------------------------------------------------------------------------------------------------------------------------------------------------------------------------------------------------------------------------------------------------------------------------------------------------------------------------------------|
| Journal:                        | <i>BMJ Open</i>                                                                                                                                                                                                                                                                                                                                                                                                                                                                                                                                                                                                                                                                                                                                                                                                                                                                                                                                                                                                                                                                                                                                                                                                                                                                                                                                                                                                                                         |
| Manuscript ID                   | bmjopen-2018-024879.R2                                                                                                                                                                                                                                                                                                                                                                                                                                                                                                                                                                                                                                                                                                                                                                                                                                                                                                                                                                                                                                                                                                                                                                                                                                                                                                                                                                                                                                  |
| Article Type:                   | Research                                                                                                                                                                                                                                                                                                                                                                                                                                                                                                                                                                                                                                                                                                                                                                                                                                                                                                                                                                                                                                                                                                                                                                                                                                                                                                                                                                                                                                                |
| Date Submitted by the Author:   | 28-Nov-2018                                                                                                                                                                                                                                                                                                                                                                                                                                                                                                                                                                                                                                                                                                                                                                                                                                                                                                                                                                                                                                                                                                                                                                                                                                                                                                                                                                                                                                             |
| Complete List of Authors:       | <p>DIAZ AGERO PEREZ, CRISTINA; Hospital Universitario Ramon y Cajal, Servicio de Medicina Preventiva y Salud Publica; INSTITUTO RAMON Y CAJAL DE INVESTIGACION SANITARIA (IRYCIS)</p> <p>LOPEZ FRESNEÑA, NIEVES; Hospital Universitario Ramon y Cajal, Servicio de Medicina Preventiva y Salud Pública; Instituto Ramón y Cajal de Investigación Sanitaria (IRYCIS)</p> <p>Rincon Carlavilla, Angela; Hospital Universitario Ramon y Cajal, Servicio de Medicina Preventiva y Salud Publica; Instituto Ramón y Cajal de Investigación Sanitaria (IRYCIS)</p> <p>Hernandez Garcia, Marta ; Hospital Universitario Ramon y Cajal, Servicio de Microbiología; Red Española de Investigación en Patología Infecciosa (REIPI)</p> <p>Ruiz-Garbajosa, Patricia; Hospital Universitario Ramon y Cajal, Servicio de Microbiología; Red Española de Investigación en Patología Infecciosa (REIPI)</p> <p>ARANAZ ANDRÉS , JESÚS MARIA; Hospital Universitario Ramon y Cajal, Servicio de Medicina Preventiva y Salud Publica; IRYCIS, INSTITUTO RAMÓN Y CAJAL DE INVESTIGACIÓN SANITARIA</p> <p>Maechler, F; Charite Universitätsmedizin Berlin, Gastmeier, Petra; Charite, Infection Control</p> <p>Bonten, Marc; University Medical Center Utrecht, Department of Medical Microbiology</p> <p>Canton, Rafael; Hospital Universitario Ramón y Cajal, Madrid, Spain, Servicio de Microbiología; Red Española de Investigación en Patología Infecciosa (REIPI)</p> |
| <b>Primary Subject Heading</b>: | Epidemiology                                                                                                                                                                                                                                                                                                                                                                                                                                                                                                                                                                                                                                                                                                                                                                                                                                                                                                                                                                                                                                                                                                                                                                                                                                                                                                                                                                                                                                            |
| Secondary Subject Heading:      | Public health                                                                                                                                                                                                                                                                                                                                                                                                                                                                                                                                                                                                                                                                                                                                                                                                                                                                                                                                                                                                                                                                                                                                                                                                                                                                                                                                                                                                                                           |
| Keywords:                       | Extended-spectrum beta-lactamase producing Enterobacteriaceae, Carbapenemase producing Enterobacteriaceae, Surveillance, Prevalence                                                                                                                                                                                                                                                                                                                                                                                                                                                                                                                                                                                                                                                                                                                                                                                                                                                                                                                                                                                                                                                                                                                                                                                                                                                                                                                     |
|                                 |                                                                                                                                                                                                                                                                                                                                                                                                                                                                                                                                                                                                                                                                                                                                                                                                                                                                                                                                                                                                                                                                                                                                                                                                                                                                                                                                                                                                                                                         |

1  
2  
3  
4  
5  
6  
7  
8  
9  
10  
11  
12  
13  
14  
15  
16  
17  
18  
19  
20  
21  
22  
23  
24  
25  
26  
27  
28  
29  
30  
31  
32  
33  
34  
35  
36  
37  
38  
39  
40  
41  
42  
43  
44  
45  
46  
47  
48  
49  
50  
51  
52  
53  
54  
55  
56  
57  
58  
59  
60



1  
2  
3 1 **TITLE:**

4  
5 2 **Local prevalence of extended-spectrum beta-lactamase (ESBL) producing**  
6  
7 3 ***Enterobacteriaceae* intestinal carriers at admission and co-expression of ESBL**  
8  
9 4 **and OXA-48 carbapenemase in *Klebsiella pneumoniae*: a prevalence survey in a**  
10  
11 5 **Spanish University Hospital**

12  
13  
14 6  
15  
16  
17 7 **Authors:**

18  
19  
20 8 C. Díaz-Agero Pérez<sup>1</sup>, N. López-Fresneña<sup>1</sup>, A.L. Rincón-Carlavilla<sup>1</sup>, M. Hernández-  
21  
22  
23 9 García<sup>2,3</sup>, P. Ruiz-Garbajosa<sup>2,3</sup>, J.M. Aranaz-Andrés<sup>1</sup>, F. Maechler<sup>4</sup>, P. Gastmeier<sup>4</sup>, M.  
24  
25  
26 10 Bonten<sup>5</sup>, R Cantón<sup>2,3</sup>

27  
28  
29  
30 11  
31  
32  
33 12 <sup>1</sup>Servicio de Medicina Preventiva y Salud Pública, Hospital Universitario Ramón y Cajal  
34  
35  
36 13 and Instituto Ramón y Cajal de Investigación Sanitaria (IRYCIS), Madrid, Spain.

37  
38  
39 14 <sup>2</sup>Servicio de Microbiología, Hospital Universitario Ramón y Cajal and Instituto Ramón y  
40  
41  
42 15 Cajal de Investigación Sanitaria (IRYCIS), Madrid, Spain.

43  
44  
45 16 <sup>3</sup>Red Española de Investigación en Patología Infecciosa (REIPI), Madrid, Spain.

46  
47  
48 17 <sup>4</sup>Charité –University Medicine Berlin, Germany.

49  
50  
51 18 <sup>5</sup>University Medical Center Utrecht (UMC Utrecht), Utrecht, The Netherlands.

52  
53  
54 19

55  
56  
57 20 **Corresponding author:**

1  
2  
3 21 Cristina Díaz-Agero Pérez  
4  
5  
6 22 Servicio de Medicina Preventiva y Salud Pública, Hospital Universitario Ramón y Cajal.  
7  
8  
9  
10 23 Carretera de Colmenar Km 9,1. Madrid 28034. Spain  
11  
12  
13 24 email address: cristina.diazagero@salud.madrid.org)  
14  
15  
16 25 Tl.: 0034913368372 / 0034913368604  
17  
18  
19  
20  
21  
22  
23  
24  
25

26  
27 **ABSTRACT**

28  
29 **Objective:** to assess the prevalence of ESBL-producing *Enterobacteriaceae* (ESBL-E)  
30  
31 fecal carriers at admission in a University Hospital in Spain.  
32  
33

34  
35 **Design:** prevalence survey.  
36  
37

38  
39 **Setting:** Pneumology, Gastroenterology, Urology and Neurosurgery units at a  
40  
41 University tertiary hospital in Madrid (Spain).  
42  
43

44  
45 **Participants:** 10,643 patients aged 18 and older admitted from March-2014 to April-  
46  
47 2016 with a rectal swab taken at admission or as soon as possible within the first 48  
48  
49 hours.  
50  
51

52  
53 **Primary and secondary outcome measures:** prevalence of ESBL-E fecal carriers and  
54  
55 prevalence of ESBL-E infections at admission.  
56  
57  
58  
59  
60

1  
2  
3  
4 40 **Results:** the ESBL-E carriers prevalence on admission was 7.69% (CI 95% 7.18-8.19).  
5  
6

7 41 Most of the isolates were *Escherichia coli* (77.51%), followed by *Klebsiella pneumoniae*  
8  
9

10 42 (20.71%). Eighty-eight (10.41%) of ESBL-E were simultaneous ESBL and  
11  
12

13 43 carbapenemase (CP) producers, 1.83% in the case of *E. coli* and 42.86% among *K.*  
14  
15

16 44 *pneumoniae* isolates. Of the ESBL typed, 52.15% belonged to the CTX-M-15 type and  
17  
18

19 45 91.38% of the carbapenemases were OXA-48 type. Only 0.43% patients presented an  
20  
21

22 46 active infection by ESBL-E at admission.  
23  
24

25 47 **Conclusions:** The prevalence found in our study is very similar to that found in the  
26  
27

28 48 literature. However, we found a high percentage of simultaneous ESBL and CP  
29  
30

31 49 producers, particularly in *Klebsiella pneumoniae*. Despite the high prevalence of  
32  
33

34 50 colonized patients, the ESBL-infection rate on admission was very low.  
35  
36

37  
38 51 **Key words:** Extended-spectrum beta-lactamase producing *Enterobacteriaceae*,  
39 52 carbapenemase producing *Enterobacteriaceae*, surveillance, prevalence.  
40  
41

42 53  
43  
44

45 54  
46  
47

48 55  
49  
50

51 56  
52

## 53 57 **ARTICLE SUMMARY**

### 54 58 **Strengths and limitations of this study**

- 55 59 • This study is one of the most prolonged in time and with the largest number of  
56 60 patients assessing colonization with multidrug resistant microorganisms,  
57 61 including adult participants of variable age groups and gender from a university



1  
2  
3 62 hospital providing specialized assistance to 8.51% of the population of Madrid  
4  
5 63 (Spain).

- 6  
7 64 • The large number of patients included (10,643) gives strength to the results.  
8  
9 65 • Genes codifying ESBL and CP were characterized by PCR and sequencing.  
10  
11 66 Unfortunately total characterization was not feasible in all isolates, only 24.67%  
12  
13 67 of total ESBL producing isolates and 73.86% of total CP producing isolates.  
14  
15  
16 68

### 17 18 69 **FUNDING STATEMENT**

- 19  
20 70 • The project falls within the R-GNOSIS study (Resistance of Gram-Negative  
21  
22 71 Organisms: Studying Intervention Strategies), within the Work Package 5  
23  
24 72 Patient isolation strategies for ESBL carriers in medical and surgical hospital  
25  
26 73 wards, funded by the European Union (FP7-HEALTH-2011-SINGLE STAGE-  
27  
28 74 N°282512).  
29  
30 75 • MH-G is supported with a contract from Instituto de Salud Carlos III of Spain  
31  
32 76 (iP-FIS program, ref. IFI14/00022).  
33  
34  
35 77

### 36 37 78 **POTENTIAL CONFLICTS OF INTEREST**

38  
39 79 All authors declare that they have no conflict of interest.  
40  
41 80  
42  
43  
44  
45  
46  
47  
48  
49  
50  
51  
52  
53  
54  
55  
56  
57  
58  
59  
60

1  
2  
3 824 83 **TEXT**5  
6 84 **BACKGROUND**

7  
8 85 The emergence of antimicrobial resistance represents a global challenge for healthcare  
9  
10 86 due to the limited treatment options. Extended-spectrum beta-lactamases (ESBL) are  
11  
12 87 the main mechanisms of acquired resistance in Gram-negative bacteria. Until the late  
13  
14 88 90s most ESBLs were isolated in nosocomial outbreaks, their prevalence was higher in  
15  
16 89 *Klebsiella pneumoniae* than *Escherichia coli*, and there was significant variation among  
17  
18 90 countries, hospitals and wards [1, 2]. They were isolated in higher frequency in the  
19  
20 91 Intensive Care Units (ICU) and recent surgery, catheterization, urinary catheterization,  
21  
22 92 prolonged hospitalization, ICU admission and previous use of cephalosporins and  
23  
24 93 aminoglycosides were leading risk factors [3, 4].

25  
26  
27 94 The situation today is very different since their prevalence has increased dramatically  
28  
29 95 in the community, especially in urinary tract infections, where these enzymes are more  
30  
31 96 frequently isolated in *E. coli* [5-8]. The main clinical relevance of ESBL seems to be the  
32  
33 97 inadequate empirical treatment, delaying the efficient antimicrobial treatment for  
34  
35 98 example up to six times in the case of *E. coli* and *K. pneumoniae* ESBL (i.e., 72 hours  
36  
37 99 instead of 11 hours for susceptible strains) [9, 10]. It is necessary to know the  
38  
39 100 prevalence of microbial resistance in our geographic area and the epidemiological  
40  
41 101 characteristics in order to establish the scope of the problem and analyze its evolution.

42  
43 102 The aim of this study was to assess the prevalence of ESBL-producing  
44  
45 103 *Enterobacteriaceae* (ESBL-E) fecal carriers at admission in hospital wards during an  
46  
47 104 active surveillance screening program (R-GNOSIS project).  
48  
49

50  
51 10552 106 **METHODS**53  
54 107 **Study design and settings**

55  
56 108 The project falls within the R-GNOSIS study (Resistance of Gram-Negative Organisms:  
57  
58 109 Studying Intervention Strategies), within the Work Package 5 Patient isolation  
59  
60

110 strategies for ESBL carriers in medical and surgical hospital wards, funded by the EU  
111 (FP7-HEALTH-2011-SINGLE STAGE-N°282512).

112 The University Hospital Ramón y Cajal is a public referral center, located in the North  
113 of Madrid (Spain). It provides specialized assistance to 558,373 citizens, who represent  
114 8.51% of the population of Madrid. With 1,118 beds, it accounted for 31,179  
115 admissions in year 2014; 31,253 in 2015, and 31,847 in 2016. The Pneumology (41  
116 beds), Gastroenterology (40 beds), Urology (41 beds) and Neurosurgery (20 beds)  
117 wards took part in the study.

### 118 **Patients**

119 Between March 3<sup>rd</sup> 2014 and April 3<sup>rd</sup> 2016, screening rectal swabs were obtained,  
120 after verbal consent, from all patients aged 18 and older, at admission or as soon as  
121 possible within the first 48 hours.

### 122 **Patient involvement**

123 Patients were not directly involved in the design and conception of the study. All  
124 patients were informed of the aim of the study and the consequences of a positive  
125 result (contact isolation and needing a new rectal screening at any hospital admission  
126 in the future to check their status) and gave their verbal consent to participate; if the  
127 patient refused the swab was not taken. As soon as the microbiological result was  
128 known by the investigators, patients and their familiars were informed.

### 129 **Laboratory analysis**

130 The samples were seeded on ChromID-ESBL and Chromo-ID CARBA/OXA-48  
131 (BioMérieux, France) selective chromogenic-agar plates. Bacterial identification was  
132 performed using the MALDI-TOF-MS (Bruker-Daltonics, Germany) mass spectrometry.  
133 ESBL and carbapenemase (CP) production were phenotypically confirmed by the  
134 double-disk diffusion test, Hodge Test and KPC/MBL/OXA-48 Confirm and ESBL  
135 AmpC Screen Kits (Rosco Diagnostica, Germany). Antimicrobial susceptibility was  
136 studied with microdilution (MicroScan, Beckman, CA) and gradient strips (Etests,

1  
2  
3 137 BioMérieux, France). Genes codifying ESBL (*bla*<sub>SHV</sub>, *bla*<sub>TEM</sub>, *bla*<sub>CTX-M</sub>) and CP (*bla*<sub>VIM</sub>,  
4  
5 138 *bla*<sub>KPC</sub>, *bla*<sub>NDM</sub>, *bla*<sub>OXA-48</sub>) were characterized by PCR and sequencing.

### 7 139 **Ethics**

9 140 The study was carried out in accordance with the Declaration of Helsinki and Good  
10  
11 141 Clinical Practice Guidelines (ICH-GCP-Guidelines, CPM/ICH/135/95) of the  
12  
13 142 European Medicines Agency.

14  
15 143 The Ethics Committee of Clinical Research (Comité Ético de Investigación Clínica  
16  
17 144 del Hospital Universitario Ramón y Cajal, Madrid, Spain) formally reviewed and  
18  
19 145 approved the study protocol on October 2013 (Ref. 251-13). A waiver of written  
20  
21 146 informed consent of individual patients in the participating wards was requested and  
22  
23 147 granted by the Committee as well as by the Medical Direction, since the study did  
24  
25 148 not expose patients to any novel risk, and no investigational drugs, devices, or  
26  
27 149 procedures were involved and verbal consent was considered sufficient.

28  
29 150 The study included all standard safeguards for ensuring the confidentiality of patient  
30  
31 151 information and specifications stipulated in the Personal Data Protection Act  
32  
33 152 15/1999, of 13 December were followed.

34  
35  
36  
37 153

### 38 154 **Statistical analyses**

39  
40 155 A descriptive analysis of the variables collected was conducted, the qualitative  
41  
42 156 variables were expressed as percentages and the quantitative variables as measures  
43  
44 157 of central tendency (mean and median) and dispersion (standard deviation). Pearson's  
45  
46 158 Chi-squared test was used to compare proportions and the Student's T-test to compare  
47  
48 159 means. All statistics analysis was performed using SPSS Statistics v19 (IBM®)  
49  
50 160 software.

### 51 161 **RESULTS**

52  
53 162 During the research period 12,590 admissions of 9,706 patients took place in the  
54  
55 163 participating wards. In 84.5% of admissions, a rectal swab could be obtained within the  
56  
57 164 first 48 hours of admission. Table 1.

165 **TABLE 1. Patients admitted to Gastroenterology, Pneumology, Urology and**  
 166 **Neurosurgery wards and patients included in the study.**

| Ward             | Admissions (n) | Swab at admission (n) | %            |
|------------------|----------------|-----------------------|--------------|
| Gastroenterology | 3,380          | 2,916                 | 86.27        |
| Pneumology       | 3,240          | 2,752                 | 84.94        |
| Urology          | 4,685          | 3,963                 | 84.59        |
| Neurosurgery     | 1,285          | 1,012                 | 78.75        |
| <b>Total</b>     | <b>12,590</b>  | <b>10,643</b>         | <b>84.55</b> |

167

168 Gender and mean age of included patients are shown in Table 2.

169

170 **TABLE 2. Age and gender of the included patients.**

| Ward             | Gender               |                      | Age (years)          |                |
|------------------|----------------------|----------------------|----------------------|----------------|
|                  | Men (%)              | Women (%)            | Mean (S.D.)          | Median (I.R.)  |
| Gastroenterology | 1,732 (59.39)        | 1,184 (40.61)        | 66.53 (16.59)        | 69 (26.75)     |
| Pneumology       | 1,625 (59.05)        | 1,127 (40.95)        | 70.72 (15.28)        | 74 (19)        |
| Urology          | 3,009 (75.93)        | 954 (24.07)          | 66.89 (14.56)        | 69 (20)        |
| Neurosurgery     | 533 (52.67)          | 479 (47.33)          | 60.23 (16.52)        | 61 (25)        |
| <b>Total</b>     | <b>6,899 (64.82)</b> | <b>3,744 (35.18)</b> | <b>64.91 (16.79)</b> | <b>67 (25)</b> |

171 S.D.: standard deviation; I.R.: interquartile range.

172

173 The prevalence of ESBL-E fecal carriers at admission was 7.69% (Table 3). Table 3  
 174 shows the distribution of carriers by gender and ward, as well as their age (mean and  
 175 median).

176 The majority of patients colonized with ESBL-E were male, just like the majority of  
 177 hospital patients, the difference not being statistically significant. The mean age of  
 178 colonized patients was higher than the mean age of the total number of hospitalized

1  
2  
3 179 patients (69.27 -S.D.15.68 vs 64.91 -S.D. 16.79-), the difference being statistically  
4  
5 180 significant ( $p = 0.0087$ ).

6  
7 181 The difference in prevalence of colonization at admission among the surveyed wards  
8  
9 182 was statistically significant ( $p = 0.001$ ). The highest prevalence was found in the  
10  
11 183 Gastroenterology ward, with 9.02%, the difference being significant with the rest of  
12  
13 184 wards ( $p = 0.01$ ). When comparing the prevalence between medical wards  
14  
15 185 (Pneumology and Gastroenterology) and surgical wards (Urology and Neurosurgery),  
16  
17 186 the difference was not statistically significant.

18  
19 187 A total of 843 multiresistant *Enterobacteriaceae* were isolated in 818 patients, as 25  
20  
21 188 patients were colonized by more than one microorganism at the time of admission  
22  
23 189 (0.23%). Eighty-eight (10.44%) of the isolated *Enterobacteriaceae* were simultaneous  
24  
25 190 ESBL and carbapenemase (CP) producers, 33.99% of these patients were known  
26  
27 191 carriers, i.e., their clinical records included a previous positive culture for ESBL-E.  
28  
29  
30  
31  
32  
33  
34  
35  
36  
37  
38  
39  
40  
41  
42  
43  
44  
45  
46  
47  
48  
49  
50  
51  
52  
53  
54  
55  
56  
57  
58  
59  
60

192

**TABLE 3. ESBL-producing *Enterobacteriaceae* carriers at admission.**

| Hospital admission<br>wards | Gender             |                    | Age (years)          |                | Prevalence (%) CI 95%   |
|-----------------------------|--------------------|--------------------|----------------------|----------------|-------------------------|
|                             | Men (%)            | Women (%)          | Mean (S.D.)          | Median (I.R.)  |                         |
| Gastroenterology            | 159 (60.23)        | 104 (39.77)        | 66.78 (16.62)        | 67.2 (26.64)   | 9.02 (7.96-10.08)       |
| Pneumology                  | 122 (61.31)        | 77 (38.69)         | 74.78 (14.36)        | 79 (15)        | 7.23 (6.25-8.22)        |
| Urology                     | 234 (80.69)        | 56 (19.31)         | 69.82 (14.04)        | 72 (21)        | 7.32 (6.49-8.14)        |
| Neurosurgery                | 44 (66.67)         | 22 (33.33)         | 62.45 (17.26)        | 66.67 (25.84)  | 6.52 (4.95-8.09)        |
| <b>Total</b>                | <b>559 (68.34)</b> | <b>259 (31.66)</b> | <b>69.27 (15.68)</b> | <b>72 (25)</b> | <b>7.69 (7.18-8.19)</b> |

193

194 ESBL: extended-spectrum beta-lactamases; S.D.: standard deviation; I.R.: interquartile range ; CI: confidence interval.

195

196

1  
2  
3 197 The most frequently isolated ESBL-producer microorganism at admission was *E. coli*  
4  
5 198 (77.70%; -n=655), followed by *K. pneumoniae* (20.64%, n=174), being only 1.66%  
6  
7 199 other species (*E. cloacae* 0.59%; *C. freundii* 0.36%; *E. aerogenes* 0.24%; *C.*  
8  
9 200 *amalonaticus* 0.12%; *C. koseri* 0.12%; *E. asburiae* 0.12%; *K. oxytoca* 0.12%). Among  
10  
11 201 ESBL-*E. coli* isolates, 1.83% were simultaneous ESBL and CP producers (n=12).  
12  
13 202 Among ESBL-*K. pneumoniae* isolates, 43.10% were simultaneous ESBL and CP  
14  
15 203 producers (n=75). Only one patient was colonized by a different ESBL and CP  
16  
17 204 producer, *K. oxytoca*.

18  
19  
20 205 The typing of 208 beta-lactamases (24.67% of total ESBL) and 65 carbapenemases  
21  
22 206 was possible (73.86% of total CP). Most of ESBL (83.17%) belonged to the CTX-M  
23  
24 207 group, CTX-M-15 being the most numerous, followed by CTX-M-14. The remaining  
25  
26 208 16.83% belonged to the SHV group, SHV-12 being the most frequent (Table 4). For the  
27  
28 209 typed CP, 90.77% were OXA-48 type (Table 5). In the case of 4 patients colonized  
29  
30 210 simultaneously by 2 different ESBL-E (in 2 patients ESBL-*E. coli* and ESBL-*K.*  
31  
32 211 *pneumoniae* and in the other ESBL+CP-*E. coli* and ESBL+CP-*K. pneumoniae*  
33  
34 212 respectively), both microorganisms carried the same enzyme type, CTX-M-15 in 3 of  
35  
36 213 them and CTX-M-14 in 1, and OXA-48 in the case of CP.

37  
38  
39 214

40  
41 215

42  
43 216

44  
45 217

46  
47 218

48  
49 219

50  
51 220

52  
53 221

54  
55 222

56  
57 223

58  
59 224



225 **TABLE 4. Distribution of ESBL strains isolated and typed in rectal swabs at**  
 226 **hospital admission**

| Enzyme       | Microorganism          |                          |                           |                            |                            |                              | Total (%)           |
|--------------|------------------------|--------------------------|---------------------------|----------------------------|----------------------------|------------------------------|---------------------|
|              | ESBL<br><i>E. coli</i> | ESBL<br><i>K. pneum.</i> | ESBL<br><i>E. cloacae</i> | ESBL<br><i>C. freundii</i> | ESBL +CP<br><i>E. coli</i> | ESBL +CP<br><i>K. pneum.</i> |                     |
| CTX-M        | 1                      | -                        | -                         | -                          | -                          | -                            | <b>1 (0.48%)</b>    |
| CTX-M-1      | 10                     | 4                        | -                         | -                          | -                          | -                            | <b>14 (6.73%)</b>   |
| CTX-M-9      | 10                     | 3                        | -                         | -                          | -                          | -                            | <b>13 (6.25%)</b>   |
| CTX-M-14     | 23                     | 1                        | -                         | -                          | -                          | 2                            | <b>26 (12.50%)</b>  |
| CTX-M-15     | 35                     | 31                       | 1                         | -                          | 3                          | 40                           | <b>110 (52.88%)</b> |
| CTX-M-27     | 6                      | -                        | -                         | -                          | -                          | -                            | <b>6 (2.88%)</b>    |
| CTX-M-32     | 2                      | -                        | -                         | -                          | -                          | -                            | <b>2 (0.96%)</b>    |
| CTX-M-55     | 1                      | -                        | -                         | -                          | -                          | -                            | <b>1 (0.48%)</b>    |
| SHV          | 1                      | 1                        | -                         | -                          | -                          | -                            | <b>2 (0.96%)</b>    |
| SHV-2        | 1                      | 1                        | -                         | -                          | -                          | -                            | <b>2 (0.96%)</b>    |
| SHV-12       | 10                     | 8                        | -                         | 1                          | -                          | 5                            | <b>24 (11.54%)</b>  |
| SHV-28       | -                      | 5                        | -                         | -                          | -                          | 1                            | <b>6 (2.88%)</b>    |
| SHV-31       | -                      | 1                        | -                         | -                          | -                          | -                            | <b>1 (0.48%)</b>    |
| <b>Total</b> | <b>100</b>             | <b>55</b>                | <b>1</b>                  | <b>1</b>                   | <b>2</b>                   | <b>48</b>                    | <b>208 (100%)</b>   |

227

228 ESBL: Extended-spectrum beta-lactamases; CP: carbapenemase.

229

230

231

232

233

234

235

236

237 **TABLE 5. Distribution of carbapenemase strains isolated and typed in rectal**  
 238 **swabs at hospital admission**

| Enzyme | Microorganism              |                                  |             |
|--------|----------------------------|----------------------------------|-------------|
|        | ESBL +CP<br><i>E. coli</i> | ESBL +CP<br><i>K. pneumoniae</i> | Total (%)   |
| KPC-3  | 1                          | -                                | 1 (1.54%)   |
| NDM-1  | -                          | 1                                | 1 (1.54%)   |
| OXA-48 | 11                         | 48                               | 59 (90.77%) |
| VIM-1  | -                          | 4                                | 4 (6.15%)   |
| Total  | 12                         | 53                               | 65 (100%)   |

239

240 ESBL: Extended-spectrum beta-lactamases; CP: carbapenemase

241

242 Fifty-four patients presented an active infection by ESBL-E at admission, i.e., 0.43% of  
 243 patients admitted during the research period and 6.6% of ESBL-E intestinal carriers. Of  
 244 those 54 patients, all except one also showed a positive rectal swab, 90.74% of those  
 245 (49 patients) with the same specie causing the infection, and 9.26% (5 patients) with a  
 246 different ESBL-E. Out of the diagnosed infections, 69.09% (38 urine cultures) were  
 247 urinary tract infections, 14.55% bacteraemia (n=8; 1 of them secondary to a  
 248 urinary tract infection), two community acquired pneumonias (3.64%), 2 surgical site  
 249 infections (3.64%), 2 abscesses (3.64%), 1 lower respiratory infection (1.82%), 1  
 250 gastrostomy insertion site infection (1.82%), and 1 Fournier's gangrene (1.82%).

251 A total of 56 microorganisms were isolated in the 55 positive clinical cultures, as one of  
 252 them was positive for two ESBL-E. The most frequently isolated microorganism was  
 253 once again *E. coli* (67.86%), followed by ESBL and CP-*K. pneumoniae* (23.21%),  
 254 ESBL-*K. pneumoniae* (7.14%); *K. oxytoca* was isolated in 1 culture (1.79%).

255

## 256 DISCUSSION

1  
2  
3 257 In our study, the prevalence of ESBL-E carriers at admission was 7.69%, ranging  
4  
5 258 between 6.52% and 9.02% depending on the ward. The prevalence of ESBL-E carriers  
6  
7 259 in healthy individuals as well as in ambulatory and hospitalized patients has been  
8  
9 260 researched in a number of studies. In all of them, *E. coli* is always the most frequently  
10  
11 261 isolated microorganism, similarly to our study (77.70%) [11-19]. In a meta-analysis  
12  
13 262 published in 2016 which analyzed prevalence studies in healthy persons, and included  
14  
15 263 28,909 individuals from 66 studies, the mean global prevalence of colonization was  
16  
17 264 14%, with great variability among regions [19]. It was higher in Asia, with 46% and  
18  
19 265 Africa with 22%; in Europe the mean prevalence was 4%, with 3% in Central Europe,  
20  
21 266 4% in Northern Europe and 6% in Southern Europe. Finally, in America, the mean  
22  
23 267 prevalence was 2%, although it was admitted that there were very few studies for this  
24  
25 268 region [20].

26  
27  
28 269 Our prevalence of intestinal carriers at admission is virtually the same to that found by  
29  
30 270 a Dutch study recently published, which was 7.9% in patients coming from their homes  
31  
32 271 and 8.6% in patients coming from long-term care facilities, a distinction not made in our  
33  
34 272 research [21]. Studies in three different areas in Spain (Madrid, Barcelona and  
35  
36 273 Zaragoza) show that the prevalence of carriers has increased in the last years,  
37  
38 274 reaching rates ranging from 5.5% and 8.1% in 2002 and 2004, similarly to our study  
39  
40 275 findings [11, 13, 16]. In another study performed in Seville, the prevalence of carriers  
41  
42 276 among patients admitted to Emergency Units was 7.4%, also very similar to our figure  
43  
44 277 [22].

45  
46  
47 278 In our facility, 10.44% of ESBL microorganisms were simultaneous carbapenemase  
48  
49 279 producers, being 85.22% *K. pneumoniae*, 13.64% *E. coli* and 1.14 *K. oxytoca*. Of the  
50  
51 280 65 carbapenemases typed (73.86% of total CP), the vast majority of them, 90.77%  
52  
53 281 belonged to the OXA-48 type. This fact is especially important in the case of *K.*  
54  
55 282 *pneumoniae* with 43.10% of them being ESBL and CP producers (90.57% OXA-48).  
56  
57 283 ESBL and CP *K. pneumoniae* was responsible for 23.21% of the infections diagnosed  
58  
59 284 at hospital admission (69.27% of them urinary tract infections). We did not find a similar

1  
2  
3 285 study to compare our data with but we think this finding must be deeply analyzed. We  
4  
5 286 found one case of KPC-3 (ESBL+CP *E. coli*) and one case of NDM-1 (ESBL+CP *K.*  
6  
7 287 *pneumoniae*).

8  
9 288 Male gender has been identified as a risk factor for the intestinal colonization by ESBL-  
10  
11 289 E [7, 20, 21, 23, 24]. In our study, as in Valverde et al., the majority of colonized  
12  
13 290 patients were men, but they were also the majority of the total number of hospitalized  
14  
15 291 patients, the difference not being statistically significant [11]. Age is another risk factor  
16  
17 292 identified in the bibliography; in our study, the mean age of colonized patients was  
18  
19 293 higher than the mean age of hospitalized patients (69.27 years vs 64.91 years), being  
20  
21 294 the difference statistically significant in this case ( $p = 0.0087$ ) [23, 24].

22  
23  
24 295 The prevalence of carriers at admission was higher in the Gastroenterology ward,  
25  
26 296 despite being younger than the mean, with a difference statistically significant as  
27  
28 297 compared to the rest of included wards. In other published studies, liver disease has  
29  
30 298 been identified as a risk factor for intestinal colonization by ESBL-E, being the  
31  
32 299 prophylactic use of fluoroquinolones to prevent spontaneous bacterial peritonitis in  
33  
34 300 patients with chronic liver disease one of the possible explanations [25, 26]. Another  
35  
36 301 risk factor for ESBL-E carriage recently described in the literature is proton pump  
37  
38 302 inhibitors (PPI) use, and these type of patients are often receiving PPIs and other  
39  
40 303 medication for gastroesophageal reflux disease [27, 28]. In our case, we cannot provide  
41  
42 304 an explanation as risk factors for every patient were not recorded.

43  
44  
45 305 Unfortunately total characterization was not feasible in all isolates due to budget issues  
46  
47 306 so we decided to analyze a random selection. We were able to determine 24.67% of  
48  
49 307 total ESBL producing isolates; that low percentage is a limitation of our study and the  
50  
51 308 results could differ if all the ESBLs had been analyzed but they are compatible with the  
52  
53 309 epidemiology described in the literature. The main enzyme group was CTX-M, the most  
54  
55 310 common according to the literature, followed by SHV, CTX-M-15 group prevailing with  
56  
57 311 52.88% [8, 12-14, 19, 21, 22, 24].

58  
59  
60 312

1  
2  
3 313 In the last years, ESBL-E infections have become an increasing concern; in the United  
4  
5 314 States for example 140,000 hospital-acquired ESBL-E infections are estimated to occur  
6  
7 315 per year [29]. Infections by these bacteria are associated to higher mortality rates and  
8  
9 316 higher hospital costs compared to antibiotic-sensitive microorganisms [30]. However,  
10  
11 317 few studies have associated the fact of being an intestinal carrier of ESBL-E with the  
12  
13 318 development of infections caused by these bacteria. A recent cohort study performed in  
14  
15 319 patients with haematological malignancies found a 3.5-fold greater risk of developing  
16  
17 320 bacteraemia by ESBL-E among colonized patients when compared to non-colonized  
18  
19 321 patients; despite of the fact that mortality was similar in both groups, colonization was  
20  
21 322 associated to longer hospital stays, shorter survival period and higher costs [31]. On  
22  
23 323 the contrary, another similar study did not find correlation between ESBL-E colonization  
24  
25 324 and infection in neutropenic patients [32]. In our study 55 ESBL-E infections were  
26  
27 325 diagnosed at admission and almost 70% were urinary tract infections. That means that  
28  
29 326 0.43% of patients were admitted with an ESBL-E infection, which represents 6.59% of  
30  
31 327 the colonized patients. Only in one patient with ESBL-E infection at admission no  
32  
33 328 ESBL-E was isolated in the rectal swabs. Even though the vast majority of infections  
34  
35 329 were found in colonized patients, the total prevalence of infection is very low, and only  
36  
37 330 in 8 cases it consisted of bacteraemia (1 of those secondary to a urinary tract  
38  
39 331 infection). In two cases patients died during hospital admission, although their infection  
40  
41 332 had been fully resolved and death was caused by an underlying oncological disease.  
42  
43 333 This study, one of the most prolonged in time and with the largest number of patients,  
44  
45 334 confirms once again the extension of ESBL-E intestinal colonization in the community  
46  
47 335 showing, however, a low prevalence of infection. It is necessary to continue with the  
48  
49 336 epidemiological surveillance of these microorganisms, in order to acquire a better  
50  
51 337 knowledge of the implications of being an intestinal carrier of ESBL-E. The high  
52  
53 338 percentage of ESBL and CP *K. pneumoniae* producers must also be more deeply  
54  
55 339 studied.  
56  
57  
58  
59  
60 340

1  
2  
3 341 **WORD COUNT**

4  
5 342 2,411

6  
7 343 **AUTHOR CONTRIBUTIONS**

8  
9 344 **Conception and design of study:** M Bonten, R Cantón, P Gastemeier, F Maechler.

10 345 **Data collection:** C Díaz-Agero Pérez, N López-Fresneña, AL Rincón-Carlavilla, M  
11 346 Hernández-García, P Ruiz-Garbajosa.

12 347 **Analysis and/or interpretation of data:** C Díaz-Agero Pérez, N López-Fresneña, AL  
13 348 Rincón-Carlavilla, M Hernández-García, P Ruiz-Garbajosa, JM Aranaz-Andrés, R  
14 349 Cantón.

15 350 **Drafting the manuscript:** C Díaz-Agero Pérez, N López-Fresneña, AL Rincón-  
16 351 Carlavilla, M Hernández-García.

17 352 **Revising the manuscript critically for important intellectual content:** R Cantón, P  
18 353 Ruiz-Garbajosa, JM Aranaz-Andrés, M Bonten, P Gastemeier, F Maechler.

19 354 **Approval of the version of the manuscript to be published:** C Díaz-Agero Pérez, N  
20 355 López-Fresneña, AL Rincón-Carlavilla, M. Hernández-García, P. Ruiz-Garbajosa, JM  
21 356 Aranaz-Andrés, F Maechler, P Gastmeier, M Bonten, R Cantón.

22 357

23 358 **DATA SHARING STATEMENT**

24 359 Extra data is available by emailing: [cristina.diazagero@salud.madrid.org](mailto:cristina.diazagero@salud.madrid.org)

25 360

26 361

27 362 **ACKNOWLEDGEMENTS**

28 363 **Previous presentation:** preliminary results from this study were presented at ECCMID

29 364 2016 on April 11, 2016, Amsterdam, the Netherlands.

30 365

31 366 **REFERENCES**

32 367 1. Winokur PL et al. Variations in the prevalence of strains expressing an extended-  
33 368 spectrum beta-lactamase phenotype and characterization of isolates from Europe, the  
34 369 Americas, and the Western Pacific region. *Clinical Infectious Diseases*. 2001; 32:94-  
35 370 103.

- 1  
2  
3 371 2. Babini GS, Livermore DM. Antimicrobial resistance amongst *Klebsiella* spp. collected  
4  
5 372 from intensive care units in Southern and Western Europe in 1997-1998. Journal of  
6  
7 373 Antimicrobial Chemotherapy. 2000; 45:183-189.  
8  
9 374 3. Paterson DL, Bonomo RA. Extended-spectrum beta-lactamases: a clinical update.  
10  
11 375 Clinical Microbiology Reviews. 2005; 18: 657-686.  
12  
13 376 4. Sirot D. Extended-spectrum plasmid-mediated beta-lactamases. Journal of  
14  
15 377 Antimicrobial Chemotherapy. 1995; 36:19-34.  
16  
17 378 5. Pitout JD et al. Population-based laboratory surveillance for *Escherichia coli*-  
18  
19 379 producing extended-spectrum betalactamases: importance of community isolates with  
20  
21 380 blaCTX-M genes. Clinical Infectious Diseases. 2004; 38:1736-1741.  
22  
23 381 6. Rodríguez-Baño J et al. Bacteremia due to extended-spectrum beta -lactamase-  
24  
25 382 producing *Escherichia coli* in the CTX-M era: a new clinical challenge. Clinical  
26  
27 383 Infectious Diseases. 2006; 43:1407-1414.  
28  
29 384 7. Ben-Ami R et al. Influx of extended-spectrum beta-lactamase-producing  
30  
31 385 Enterobacteriaceae into the hospital. Clinical Infectious Diseases. 2006; 42: 925-934.  
32  
33 386 8. Woerther PL et al. Trends in human fecal carriage of extended-spectrum beta-  
34  
35 387 lactamases in the community: Toward the globalization of CTX-M. Clinical Microbiology  
36  
37 388 Reviews. 2013; 26: 744–758.  
38  
39 389 9. García E et al. Bacteriemias por *Escherichia coli* productor de betalactamasas de  
40  
41 390 espectro extendido (BLEE): Significación clínica y perspectivas actuales. España.  
42  
43 391 Revista Española de Quimioterapia. 2011; 24: 57-66.  
44  
45 392 10. Lautenbach E et al. Extended-spectrum beta-lactamase-producing *Escherichia coli*  
46  
47 393 and *Klebsiella pneumoniae*: risk factors for infection and impact of resistance on  
48  
49 394 outcomes. Clinical Infectious Diseases. 2001; 32: 1162-1171.  
50  
51 395 11. Valverde A et al. Dramatic increase in prevalence of fecal carriage of extended-  
52  
53 396 spectrum b-lactamase-producing *Enterobacteriaceae* during nonoutbreak situations in  
54  
55 397 Spain. Journal of Clinical Microbiology. 2004; 42: 4769–4775.  
56  
57  
58  
59  
60

- 1  
2  
3 398 12. Munday CJ et al. Predominance and genetic diversity of community- and hospital-  
4  
5 399 acquired CTX-M extended-spectrum b-lactamases in York, UK. Journal of Antimicrobial  
6  
7 400 Chemotherapy. 2004; 54: 628–633.  
8  
9 401 13. Miró E et al. Surveillance of extended spectrum b-lactamases from clinical samples  
10  
11 402 and faecal carriers in Barcelona, Spain. Journal of Antimicrobial Chemotherapy. 2005;  
12  
13 403 56: 1152–1155.  
14  
15 404 14. Moubareck C et al. Countrywide spread of community- and hospital-acquired  
16  
17 405 extended-spectrum b-lactamase (CTX-M-15)-producing *Enterobacteriaceae* in  
18  
19 406 Lebanon. Journal of Clinical Microbiology. 2005; 43: 3309–3313.  
20  
21  
22 407 15. Rodrigues C et al. Extended-spectrum b-lactamase-producing flora in healthy  
23  
24 408 persons. Emerging Infectious Diseases. 2005; 11: 981–982.  
25  
26 409 16. Castillo García FJ et al. Prevalence of fecal carriage of ESBL-producing  
27  
28 410 *Enterobacteriaceae* in hospitalized and ambulatory patients during two non-outbreak  
29  
30 411 periods. European Journal of Clinical Microbiology & Infectious Diseases. 2007; 26:  
31  
32 412 77–78.  
33  
34 413 17. Kader AA, Kumar A, Kamath KA. Fecal carriage of extended spectrum b-  
35  
36 414 lactamase-producing *Escherichia coli* and *Klebsiella pneumoniae* in patients and  
37  
38 415 asymptomatic healthy individuals. Infection Control & Hospital Epidemiology. 2007; 28:  
39  
40 416 1114–1146.  
41  
42  
43 417 18. Pallecchi L et al. Rapid dissemination and diversity of CTX-M extended-spectrum  
44  
45 418 b-lactamase genes in comensal *Escherichia coli* isolates from healthy children from  
46  
47 419 low-resource settings in Latin America. Antimicrobial Agents and Chemotherapy.  
48  
49 420 2007; 51: 2720–2725.  
50  
51 421 19. Karanika S et al. Fecal colonization with extended-spectrum beta-lactamase-  
52  
53 422 producing *Enterobacteriaceae* and risk factors among healthy individuals: a systematic  
54  
55 423 review and metaanalysis. Clinical Infectious Diseases. 2016; 63:310-318.  
56  
57  
58  
59  
60



- 1  
2  
3 424 20. Shitrit P et al. Extended-spectrum beta-lactamase-producing *Enterobacteriaceae*  
4  
5 425 carriage upon hospital admission: prevalence and risk factors. Journal of Hospital  
6  
7 426 Infection. 2013; 85: 230-232.  
8  
9 427 21. Platteel TN et al. Predicting carriage with extended-spectrum beta-lactamase-  
10  
11 428 producing bacteria at hospital admission: a cross-sectional study. Clinical Microbiology  
12  
13 429 and Infection. 2015; 21: 141–146.  
14  
15 430 22. Rodríguez-Baño J et al. Faecal carriage of extended-spectrum beta-lactamase-  
16  
17 431 producing *Escherichia coli*: prevalence, risk factors and molecular epidemiology.  
18  
19 432 Journal of Antimicrobial Chemotherapy. 2008; 62: 1142-1149.  
20  
21 433 23. Ruppé E et al. Clinical predictive values of extended-spectrum beta-lactamase  
22  
23 434 carriage in patients admitted to medical wards. European Journal of Clinical  
24  
25 435 Microbiology & Infectious Diseases. 2012; 31: 319–325.  
26  
27 436 24. Ben-Ami R et al. A multinational survey of risk factors for infection with extended-  
28  
29 437 spectrum beta-lactamase-producing enterobacteriaceae in nonhospitalized  
30  
31 438 patients. Clinical Infectious Diseases. 2009; 49: 682–690.  
32  
33 439 25. Pasricha J. Carriage of extended-spectrum beta-lactamase-producing  
34  
35 440 *Enterobacteriaceae* among internal medicine patients in Switzerland. Antimicrobial  
36  
37 441 Resistance & Infection Control. 2013; 2: 20.  
38  
39 442 26. Han JH et al. Risk factors for gastrointestinal tract colonization with extended-  
40  
41 443 spectrum beta-lactamase (ESBL)-producing *Escherichia coli* and *Klebsiella* species in  
42  
43 444 hospitalized patients. Infection Control & Hospital Epidemiology. 2012; 33:1242–1245.  
44  
45 445 27. Hamprecht A et al. Colonization with third-generation cephalosporin-resistant  
46  
47 446 *Enterobacteriaceae* on hospital admission: prevalence and risk factors. Journal of  
48  
49 447 Antimicrobial Chemotherapy. 2016; 71: 2957-2963.  
50  
51 448 28. Huizinga P et al. Proton Pump Inhibitor use is associated with extended-spectrum  
52  
53 449  $\beta$ -lactamase-producing *Enterobacteriaceae* rectal carriage at hospital admission: a  
54  
55 450 cross-sectional study. Clinical Infectious Diseases. 2017; 64: 361-363.  
56  
57  
58  
59  
60

- 1  
2  
3 451 29. Centers for Disease Control and Prevention (2013). Antibiotic Resistance Threats  
4  
5 452 in the United States. U.S. Department of Health and Human Services; Centers for  
6  
7 453 Disease Control and Prevention. [http://www.cdc.gov/drugresistance/pdf/ar-threats-](http://www.cdc.gov/drugresistance/pdf/ar-threats-2013-508.pdf)  
8  
9 454 [2013-508.pdf](http://www.cdc.gov/drugresistance/pdf/ar-threats-2013-508.pdf). Accessed 12 December 2017.  
10  
11 455 30. Stewardson AJ et al. The health and economic burden of bloodstream infections  
12  
13 456 caused by antimicrobial susceptible and non-susceptible *Enterobacteriaceae* and  
14  
15 457 *Staphylococcus aureus* in European hospitals, 2010 and 2011: a multicentre  
16  
17 458 retrospective cohort study. *Eurosurveillance* 21. doi: 10.2807/1560-  
18  
19 459 7917.ES.2016.21.33.30319.  
20  
21 460 31. Cornejo-Juárez P et al. Fecal ESBL *Escherichia coli* carriage as a risk factor for  
22  
23 461 bacteremia in patients with hematological malignancies. *Supportive Care in Cancer*.  
24  
25 462 2016; 24:253–259.  
26  
27 463 32. Arnan M et al. Risk factors for, and clinical relevance of, faecal extended spectrum  
28  
29 464 beta-lactamase producing *Escherichia coli* (ESBL-EC) carriage in neutropenic patients  
30  
31 465 with haematological malignancies. *European Journal of Clinical Microbiology &*  
32  
33 466 *Infectious Diseases*. 2011; 30:355–360.  
34  
35  
36  
37  
38  
39  
40  
41  
42  
43  
44  
45  
46  
47  
48  
49  
50  
51  
52  
53  
54  
55  
56  
57  
58  
59  
60

# Reporting checklist for cross sectional study.

Based on the STROBE cross sectional guidelines.

## Instructions to authors

Complete this checklist by entering the page numbers from your manuscript where readers will find each of the items listed below.

Your article may not currently address all the items on the checklist. Please modify your text to include the missing information. If you are certain that an item does not apply, please write "n/a" and provide a short explanation.

Upload your completed checklist as an extra file when you submit to a journal.

In your methods section, say that you used the STROBE cross sectional reporting guidelines, and cite them as:

von Elm E, Altman DG, Egger M, Pocock SJ, Gotsche PC, Vandenbroucke JP. The Strengthening the Reporting of Observational Studies in Epidemiology (STROBE) Statement: guidelines for reporting observational studies.

|                        |     | Reporting Item                                                                                                                  | Page Number |
|------------------------|-----|---------------------------------------------------------------------------------------------------------------------------------|-------------|
| Title                  | #1a | Indicate the study's design with a commonly used term in the title or the abstract                                              | 2           |
| Abstract               | #1b | Provide in the abstract an informative and balanced summary of what was done and what was found                                 | 2           |
| Background / rationale | #2  | Explain the scientific background and rationale for the investigation being reported                                            | 4           |
| Objectives             | #3  | State specific objectives, including any prespecified hypotheses                                                                | 5           |
| Study design           | #4  | Present key elements of study design early in the paper                                                                         | 5           |
| Setting                | #5  | Describe the setting, locations, and relevant dates, including periods of recruitment, exposure, follow-up, and data collection | 5           |
| Eligibility criteria   | #6a | Give the eligibility criteria, and the sources and methods of selection of participants.                                        | 5           |

|    |                  |      |                                                                   |    |
|----|------------------|------|-------------------------------------------------------------------|----|
| 1  |                  | #7   | Clearly define all outcomes, exposures, predictors, potential     | 6  |
| 2  |                  |      | confounders, and effect modifiers. Give diagnostic criteria, if   |    |
| 3  |                  |      | applicable                                                        |    |
| 4  |                  |      |                                                                   |    |
| 5  |                  |      |                                                                   |    |
| 6  | Data sources /   | #8   | For each variable of interest give sources of data and details of | 6  |
| 7  | measurement      |      | methods of assessment (measurement). Describe                     |    |
| 8  |                  |      | comparability of assessment methods if there is more than one     |    |
| 9  |                  |      | group. Give information separately for for exposed and            |    |
| 10 |                  |      | unexposed groups if applicable.                                   |    |
| 11 |                  |      |                                                                   |    |
| 12 |                  |      |                                                                   |    |
| 13 |                  |      |                                                                   |    |
| 14 | Bias             | #9   | Describe any efforts to address potential sources of bias         | 6  |
| 15 |                  |      |                                                                   |    |
| 16 |                  |      |                                                                   |    |
| 17 | Study size       | #10  | Explain how the study size was arrived at                         | 7  |
| 18 |                  |      |                                                                   |    |
| 19 | Quantitative     | #11  | Explain how quantitative variables were handled in the            | 6  |
| 20 | variables        |      | analyses. If applicable, describe which groupings were chosen,    |    |
| 21 |                  |      | and why                                                           |    |
| 22 |                  |      |                                                                   |    |
| 23 |                  |      |                                                                   |    |
| 24 | Statistical      | #12a | Describe all statistical methods, including those used to control | 6  |
| 25 | methods          |      | for confounding                                                   |    |
| 26 |                  |      |                                                                   |    |
| 27 |                  |      |                                                                   |    |
| 28 |                  | #12b | Describe any methods used to examine subgroups and                | 6  |
| 29 |                  |      | interactions                                                      |    |
| 30 |                  |      |                                                                   |    |
| 31 |                  |      |                                                                   |    |
| 32 |                  | #12c | Explain how missing data were addressed                           | NA |
| 33 |                  |      |                                                                   |    |
| 34 |                  | #12d | If applicable, describe analytical methods taking account of      | NA |
| 35 |                  |      | sampling strategy                                                 |    |
| 36 |                  |      |                                                                   |    |
| 37 |                  |      |                                                                   |    |
| 38 |                  | #12e | Describe any sensitivity analyses                                 | NA |
| 39 |                  |      |                                                                   |    |
| 40 |                  |      |                                                                   |    |
| 41 | Participants     | #13a | Report numbers of individuals at each stage of study—eg           | 7  |
| 42 |                  |      | numbers potentially eligible, examined for eligibility, confirmed |    |
| 43 |                  |      | eligible, included in the study, completing follow-up, and        |    |
| 44 |                  |      | analysed. Give information separately for for exposed and         |    |
| 45 |                  |      | unexposed groups if applicable.                                   |    |
| 46 |                  |      |                                                                   |    |
| 47 |                  |      |                                                                   |    |
| 48 |                  |      |                                                                   |    |
| 49 |                  | #13b | Give reasons for non-participation at each stage                  | 7  |
| 50 |                  |      |                                                                   |    |
| 51 |                  | #13c | Consider use of a flow diagram                                    | NA |
| 52 |                  |      |                                                                   |    |
| 53 |                  |      |                                                                   |    |
| 54 | Descriptive data | #14a | Give characteristics of study participants (eg demographic,       | 7  |
| 55 |                  |      | clinical, social) and information on exposures and potential      |    |
| 56 |                  |      | confounders. Give information separately for exposed and          |    |
| 57 |                  |      | unexposed groups if applicable.                                   |    |
| 58 |                  |      |                                                                   |    |
| 59 |                  |      |                                                                   |    |
| 60 |                  |      |                                                                   |    |

|    |                  |      |                                                                      |       |
|----|------------------|------|----------------------------------------------------------------------|-------|
| 1  |                  | #14b | Indicate number of participants with missing data for each           | 7     |
| 2  |                  |      | variable of interest                                                 |       |
| 3  |                  |      |                                                                      |       |
| 4  |                  |      |                                                                      |       |
| 5  | Outcome data     | #15  | Report numbers of outcome events or summary measures.                | 7     |
| 6  |                  |      | Give information separately for exposed and unexposed                |       |
| 7  |                  |      | groups if applicable.                                                |       |
| 8  |                  |      |                                                                      |       |
| 9  |                  |      |                                                                      |       |
| 10 | Main results     | #16a | Give unadjusted estimates and, if applicable, confounder-            | 7     |
| 11 |                  |      | adjusted estimates and their precision (eg, 95% confidence           |       |
| 12 |                  |      | interval). Make clear which confounders were adjusted for and        |       |
| 13 |                  |      | why they were included                                               |       |
| 14 |                  |      |                                                                      |       |
| 15 |                  |      |                                                                      |       |
| 16 |                  |      |                                                                      |       |
| 17 |                  | #16b | Report category boundaries when continuous variables were            | 7     |
| 18 |                  |      | categorized                                                          |       |
| 19 |                  |      |                                                                      |       |
| 20 |                  |      |                                                                      |       |
| 21 |                  | #16c | If relevant, consider translating estimates of relative risk into    | NA    |
| 22 |                  |      | absolute risk for a meaningful time period                           |       |
| 23 |                  |      |                                                                      |       |
| 24 | Other analyses   | #17  | Report other analyses done—e.g., analyses of subgroups and           | 8     |
| 25 |                  |      | interactions, and sensitivity analyses                               |       |
| 26 |                  |      |                                                                      |       |
| 27 |                  |      |                                                                      |       |
| 28 | Key results      | #18  | Summarise key results with reference to study objectives             | 9     |
| 29 |                  |      |                                                                      |       |
| 30 |                  |      |                                                                      |       |
| 31 | Limitations      | #19  | Discuss limitations of the study, taking into account sources of     | 10    |
| 32 |                  |      | potential bias or imprecision. Discuss both direction and            |       |
| 33 |                  |      | magnitude of any potential bias.                                     |       |
| 34 |                  |      |                                                                      |       |
| 35 |                  |      |                                                                      |       |
| 36 | Interpretation   | #20  | Give a cautious overall interpretation considering objectives,       | 11-12 |
| 37 |                  |      | limitations, multiplicity of analyses, results from similar studies, |       |
| 38 |                  |      | and other relevant evidence.                                         |       |
| 39 |                  |      |                                                                      |       |
| 40 |                  |      |                                                                      |       |
| 41 | Generalisability | #21  | Discuss the generalisability (external validity) of the study        | 11-12 |
| 42 |                  |      | results                                                              |       |
| 43 |                  |      |                                                                      |       |
| 44 |                  |      |                                                                      |       |
| 45 | Funding          | #22  | Give the source of funding and the role of the funders for the       | 3     |
| 46 |                  |      | present study and, if applicable, for the original study on which    |       |
| 47 |                  |      | the present article is based                                         |       |
| 48 |                  |      |                                                                      |       |
| 49 |                  |      |                                                                      |       |

The STROBE checklist is distributed under the terms of the Creative Commons Attribution License CC-BY. This checklist was completed on 15. June 2018 using <http://www.goodreports.org/>, a tool made by the [EQUATOR Network](#) in collaboration with [Penelope.ai](#)
